# Supplementary material for: Household solid waste management practices and perceptions among residents in the East Coast of Malaysia
Source: Springer Nature journal article supplement (doi:10.1186/s12889-021-12274-7), 2022-01-05
Supplement: MOESM1 [file 20004358]

## Questionnaire (English Version)

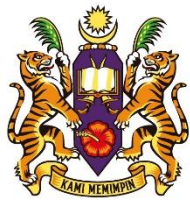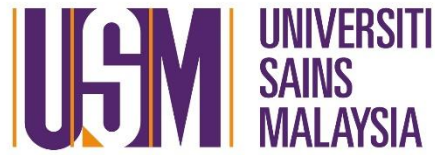

QUESTIONNAIRE

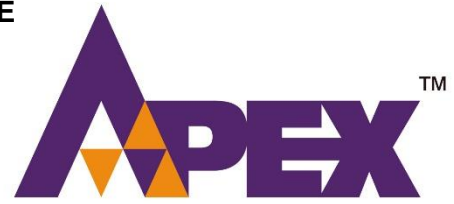

### Community Based Assessment on Household Management of Solid Waste among Residents in Kota Bharu district, Kelantan.

#### Instructions:

1. This questionnaire composed of 2 parts which are:

PART 1: SOCIO-DEMOGRAPHIC DATA

PART 2: PRACTICES OF SOLID WASTE MANAGEMENT AT HOUSEHOLD LEVEL

2. Participant must answer all the questions provided.

3. Please fill in the blanks or circle the desired answers based on the type of question given.

#### NOTES

All information provided is confidential. Data obtained from this study is used solely for the purpose of this research only.

## **Part 1: SOCIO-DEMOGRAPHIC DATA**

**Please fill (x) in the blanks with the appropriate answer.**

### **1.1 Gender**

Male

Female

### **1.2 Age**

18 – 24

25 – 29

30 – 34

35 - 49

### **1.3 Educational Level**

Primary School Education

Secondary School Education

Certificate/Diploma

Undergraduate Education

Postgraduate Degree

Other: \_\_\_\_\_

### **1.4 Marital Status**

Single

Married

Divorced

### **1.5 Religion**

Muslim

Buddha

Christian

Other: \_\_\_\_\_

### **1.6 Average monthly household income**

<RM1K

RM1-2K

RM2-3K

RM4-5K

RM5-10K

>RM10K

**1.7 Occupation**

- Self-employed
- Private-sector employed
- Housewife
- Civil servant
- Retiree
- Other: \_\_\_\_\_

**1.8 Type of housing unit**

- Bungalow
- Detached house
- Semi-detached house
- Other (specify): \_\_\_\_\_

**1.9 Number of people living in the house**

- 1 – 3
- 4 – 6
- >7

**1.10 Cook at home**

- No
- Yes

**1.11 Cooking frequency**

- Daily
- Two times a week
- Three times a week
- Once a week
- Not cooking

## Part 2: HOUSEHOLD SOLID WASTE MANAGEMENT PRACTICES

### METHODS OF WASTE DISPOSAL

#### 2.1 What are the types of waste generated by household?

Food debris  Bottles and cans   
Plastics  Others (Specify): \_\_\_\_\_

#### 2.2 Separation of household waste

Yes   
No

#### 2.3 Where do you dispose your household waste?

Appropriate site   
Inappropriate site

#### 2.4 Who dispose the waste to the nearest bin provided by the local authority?

Own self  Paid collector   
Children  Others

### PERCEPTION OF HOUSEHOLD TOWARD WASTE MANAGEMENT

#### 2.5 Do you think waste management is important?

It is important   
It is not important

#### 2.6 Who is responsible to clean waste in the residential area?

Residence  District council   
Community  Private waste operators

#### 2.7 Can poor waste management contribute to disease occurrence?

Yes   
No   
Not sure

#### 2.8 What are the kinds of disease it can cause?

Malaria  Diarrhea   
Typhoid  Others

#### 2.9 Do you educate your household on proper waste disposal?

Yes   
No

#### 2.10 How do you motivate your household to dispose their waste?

Cleanliness   
Fear of illness   
Odour
