# Supplementary material for: Household solid waste management practices and perceptions among residents in the East Coast of Malaysia
Source: Springer Nature journal article supplement (doi:10.1186/s12889-021-12274-7), 2022-01-05
Supplement: MOESM2 [file 20004358]

Supplementary material

Household Solid Waste Management Practices and Perceptions Among Residents in The East Coast of Malaysia

Widad Fadhullah; Nor Iffah Najwa Imran; Sharifah Norkhadijah Syed Ismail; Mohd Hafiidz Jaafar; Hasmah Abdullah

BMC Public Health

| SOCIO-DEMOGRAPHIC CHARACTERISTICS OF STUDY PARTICIPANTS |        |       |                       |                |          |                  |                         |                      |                                      |                 |                    |
|---------------------------------------------------------|--------|-------|-----------------------|----------------|----------|------------------|-------------------------|----------------------|--------------------------------------|-----------------|--------------------|
| ID                                                      | Gender | Age   | Education             | Marital Status | Religion | Monthly earnings | Occupation              | Type of housing unit | Number of people living in the house | Cooking at home | Cooking frequency  |
| 1                                                       | male   | 35-49 | Diploma/Degree        | married        | muslim   | rm2-3k           | self-employed           | village              | 4-6 people                           | yes             | daily              |
| 2                                                       | male   | 35-49 | Diploma/Degree        | married        | muslim   | rm4-5k           | civil servant           | bungalow             | 4-6 people                           | yes             | daily              |
| 3                                                       | female | 25-29 | Diploma/Degree        | single         | muslim   | rm1-2k           | private-sector employed | bungalow             | 4-6 people                           | yes             | daily              |
| 4                                                       | female | 35-49 | Secondary/Certificate | divorced       | muslim   | <rm1k            | private-sector employed | village              | 1-3 people                           | yes             | three times a week |
| 5                                                       | male   | 30-34 | Diploma/Degree        | married        | muslim   | rm4-5k           | civil servant           | detached house       | 4-6 people                           | no              | not cooking        |
| 6                                                       | female | 35-49 | Secondary/Certificate | divorced       | muslim   | <rm1k            | self-employed           | village              | 4-6 people                           | yes             | daily              |
| 7                                                       | female | 50-65 | Secondary/Certificate | married        | muslim   | <rm1k            | housewife               | village              | 4-6 people                           | yes             | daily              |
| 8                                                       | male   | 30-34 | Secondary/Certificate | married        | muslim   | <rm1k            | self-employed           | village              | 1-3 people                           | yes             | daily              |
| 9                                                       | male   | 50-65 | Secondary/Certificate | married        | muslim   | rm2-3k           | civil servant           | village              | 4-6 people                           | yes             | three times a week |

|    |        |       |                       |         |        |         |                         |          |            |     |                    |
|----|--------|-------|-----------------------|---------|--------|---------|-------------------------|----------|------------|-----|--------------------|
| 10 | male   | 35-49 | Diploma/Degree        | married | muslim | rm4-5k  | civil servant           | village  | 4-6 people | yes | daily              |
| 11 | male   | 50-65 | Secondary/Certificate | married | muslim | rm1-2k  | civil servant           | village  | 4-6 people | yes | daily              |
| 12 | female | 50-65 | Secondary/Certificate | married | muslim | rm1-2k  | private-sector employed | village  | 4-6 people | yes | 2 times a week     |
| 13 | female | 30-34 | Secondary/Certificate | married | muslim | <rm1k   | others                  | village  | 4-6 people | yes | daily              |
| 14 | female | 35-49 | Secondary/Certificate | married | muslim | <rm1k   | self-employed           | village  | 4-6 people | yes | daily              |
| 15 | female | 50-65 | Secondary/Certificate | married | muslim | rm2-3k  | retiree                 | village  | 4-6 people | yes | daily              |
| 16 | male   | 50-65 | Secondary/Certificate | married | muslim | <rm1k   | others                  | village  | 1-3 people | yes | daily              |
| 17 | female | 50-65 | Secondary/Certificate | married | muslim | <rm1k   | self-employed           | village  | 4-6 people | yes | daily              |
| 18 | female | 50-65 | primary               | married | muslim | rm1-2k  | housewife               | village  | 1-3 people | yes | three times a week |
| 19 | male   | >65   | Secondary/Certificate | married | muslim | <rm1k   | self-employed           | bungalow | 1-3 people | yes | three times a week |
| 20 | female | 50-65 | Secondary/Certificate | married | muslim | rm5-10k | housewife               | bungalow | 1-3 people | yes | daily              |
| 21 | female | 35-49 | Secondary/Certificate | married | muslim | rm1-2k  | self-employed           | village  | >6         | yes | daily              |
| 22 | female | 50-65 | Secondary/Certificate | married | muslim | <rm1k   | self-employed           | village  | >6         | yes | daily              |
| 23 | male   | 50-65 | Diploma/Degree        | married | muslim | <rm1k   | self-employed           | village  | >6         | yes | daily              |
| 24 | female | 35-49 | Secondary/Certificate | married | muslim | <rm1k   | housewife               | village  | 4-6 people | yes | daily              |

|    |        |       |                       |         |        |        |                         |                |            |     |                    |
|----|--------|-------|-----------------------|---------|--------|--------|-------------------------|----------------|------------|-----|--------------------|
| 25 | male   | 18-24 | Secondary/Certificate | single  | muslim | rm1-2k | self-employed           | village        | >6         | yes | three times a week |
| 26 | female | 50-65 | Secondary/Certificate | married | muslim | <rm1k  | housewife               | village        | >6         | yes | daily              |
| 27 | male   | 50-65 | Diploma/Degree        | married | muslim | rm1-2k | private-sector employed | bungalow       | 4-6 people | yes | three times a week |
| 28 | female | >68   | primary               | married | muslim | <rm1k  | others                  | village        | 1-3 people | yes | three times a week |
| 29 | male   | 30-34 | Secondary/Certificate | single  | muslim | <rm1k  | self-employed           | village        | 1-3 people | no  | not cooking        |
| 30 | female | 18-24 | Diploma/Degree        | single  | muslim | rm2-3k | others                  | village        | 4-6 people | yes | daily              |
| 31 | male   | 18-24 | Diploma/Degree        | single  | muslim | rm2-3k | private-sector employed | Others         | >6         | Yes | daily              |
| 32 | female | 50-65 | Secondary/Certificate | married | muslim | rm1-2k | housewife               | Others         | 1-3 people | Yes | three times a week |
| 33 | male   | 30-34 | Diploma/Degree        | married | muslim | rm2-3k | retiree                 | bungalow       | 1-3 people | No  | not cooking        |
| 34 | male   | 50-65 | Secondary/Certificate | married | buddha | rm2-3k | self-employed           | Others         | 4-6 people | No  | not cooking        |
| 35 | female | 35-49 | Secondary/Certificate | married | muslim | <rm1k  | housewife               | Others         | 4-6 people | Yes | daily              |
| 36 | female | 35-49 | Secondary/Certificate | married | buddha | rm4-5k | housewife               | detached house | 4-6 people | Yes | daily              |
| 37 | male   | 50-65 | Secondary/Certificate | married | muslim | rm1-2k | retiree                 | Others         | 4-6 people | Yes | daily              |
| 38 | male   | 30-34 | Diploma/Degree        | married | muslim | rm2-3k | private-sector employed | Others         | 4-6 people | Yes | daily              |

|    |        |       |                       |         |        |         |                         |                     |            |     |                    |
|----|--------|-------|-----------------------|---------|--------|---------|-------------------------|---------------------|------------|-----|--------------------|
| 39 | male   | 50-65 | Secondary/Certificate | married | muslim | rm1-2k  | self-employed           | Others              | 4-6 people | Yes | three times a week |
| 40 | female | 35-49 | Diploma/Degree        | married | muslim | rm5-10k | civil servant           | bungalow            | 4-6 people | No  | not cooking        |
| 41 | male   | 35-49 | Diploma/Degree        | single  | muslim | rm1-2k  | self-employed           | semi-detached house | 1-3 people | No  | not cooking        |
| 42 | male   | 50-65 | Secondary/Certificate | married | buddha | rm4-5k  | retiree                 | bungalow            | 4-6 people | No  | not cooking        |
| 43 | male   | 35-49 | Secondary/Certificate | single  | muslim | <rm1k   | self-employed           | Others              | 1-3 people | Yes | daily              |
| 44 | male   | 18-24 | Diploma/Degree        | single  | muslim | <rm1k   | private-sector employed | Others              | 1-3 people | Yes | daily              |
| 45 | female | 30-34 | Diploma/Degree        | married | muslim | rm5-10k | civil servant           | Others              | 4-6 people | Yes | three times a week |
| 46 | male   | 30-34 | Diploma/Degree        | married | muslim | rm2-3k  | civil servant           | Others              | 4-6 people | No  | not cooking        |
| 47 | female | 50-65 | Secondary/Certificate | married | muslim | rm1-2k  | housewife               | Others              | 1-3 people | Yes | three times a week |
| 48 | female | 50-65 | Secondary/Certificate | married | muslim | <rm1k   | self-employed           | detached house      | >6         | No  | not cooking        |
| 49 | male   | 50-65 | Secondary/Certificate | married | muslim | rm2-3k  | retiree                 | Others              | 1-3 people | Yes | once a week        |
| 50 | female | 35-49 | Diploma/Degree        | married | muslim | rm4-5k  | civil servant           | Others              | 4-6 people | Yes | daily              |
| 51 | female | 50-65 | Secondary/Certificate | married | muslim | rm4-5k  | housewife               | Others              | 4-6 people | Yes | daily              |
| 52 | female | 50-65 | Primary               | married | buddha | rm1-2k  | housewife               | Others              | 4-6 people | Yes | daily              |

|    |        |       |                       |         |        |         |                         |                |            |     |                    |
|----|--------|-------|-----------------------|---------|--------|---------|-------------------------|----------------|------------|-----|--------------------|
| 53 | female | 18-24 | Secondary/Certificate | single  | buddha | rm2-3k  | self-employed           | Others         | >6         | Yes | three times a week |
| 54 | male   | 50-65 | Diploma/Degree        | married | muslim | rm5-10k | retiree                 | bungalow       | 1-3 people | No  | not cooking daily  |
| 55 | female | 50-65 | Postgraduate          | married | muslim | rm5-10k | housewife               | bungalow       | >6         | Yes | three times a week |
| 56 | female | 25-29 | Secondary/Certificate | married | muslim | rm1-2k  | housewife               | bungalow       | 4-6 people | Yes | daily              |
| 57 | male   | 30-34 | Secondary/Certificate | married | buddha | rm5-10k | self-employed           | bungalow       | 4-6 people | Yes | daily              |
| 58 | female | 18-24 | Secondary/Certificate | single  | muslim | <rm1k   | student                 | Others         | 4-6 people | Yes | three times a week |
| 59 | female | 50-65 | Secondary/Certificate | married | muslim | rm2-3k  | housewife               | Others         | 4-6 people | Yes | daily              |
| 60 | male   | 35-49 | Secondary/Certificate | married | muslim | rm4-5k  | civil servant           | Others         | 4-6 people | Yes | three times a week |
| 61 | female | 25-29 | Diploma/Degree        | married | muslim | rm2-3k  | civil servant           | detached house | 4-6 people | Yes | three times a week |
| 62 | male   | 50-65 | Secondary/Certificate | married | muslim | rm1-2k  | self-employed           | others         | 4-6 people | Yes | daily              |
| 63 | male   | 35-49 | Diploma/Degree        | married | muslim | rm2-3k  | private-sector employed | bungalow       | 4-6 people | Yes | daily              |
| 64 | female | 30-34 | Secondary/Certificate | single  | muslim | rm1-2k  | housewife               | others         | 4-6 people | No  | not cooking daily  |
| 65 | male   | 30-34 | Postgraduate          | single  | muslim | rm5-10k | civil servant           | bungalow       | 1-3 people | Yes | daily              |
| 66 | male   | 50-65 | Secondary/Certificate | married | muslim | rm1-2k  | self-employed           | detached house | 4-6 people | Yes | every other day    |

|    |        |       |                       |         |        |         |                         |                     |            |     |                    |
|----|--------|-------|-----------------------|---------|--------|---------|-------------------------|---------------------|------------|-----|--------------------|
| 67 | female | 18-24 | Primary               | married | muslim | rm2-3k  | housewife               | detached house      | 4-6 people | Yes | daily              |
| 68 | male   | 25-29 | Diploma/Degree        | married | muslim | rm1-2k  | civil servant           | detached house      | 1-3 people | Yes | three times a week |
| 69 | female | 35-49 | Diploma/Degree        | married | muslim | rm1-2k  | civil servant           | others              | 4-6 people | Yes | daily              |
| 70 | male   | 25-29 | Diploma/Degree        | married | muslim | rm4-5k  | private-sector employed | others              | 4-6 people | Yes | three times a week |
| 71 | male   | 35-49 | Diploma/Degree        | married | muslim | rm5-10k | civil servant           | others              | >6         | Yes | daily              |
| 72 | male   | 50-65 | Secondary/Certificate | married | muslim | rm2-3k  | retiree                 | others              | 4-6 people | Yes | three times a week |
| 73 | male   | >65   | Primary               | married | muslim | rm1-2k  | retiree                 | others              | 4-6 people | Yes | daily              |
| 74 | female | 35-49 | Diploma/Degree        | married | muslim | rm2-3k  | self-employed           | bungalow            | 4-6 people | Yes | once a week        |
| 75 | female | 35-49 | Secondary/Certificate | married | muslim | rm2-3k  | civil servant           | others              | 4-6 people | No  | not cooking        |
| 76 | male   | 35-49 | Diploma/Degree        | married | muslim | rm5-10k | civil servant           | bungalow            | >6         | Yes | once a week        |
| 77 | male   | >65   | Secondary/Certificate | married | muslim | rm2-3k  | retiree                 | others              | 4-6 people | Yes | daily              |
| 78 | female | 25-29 | Diploma/Degree        | married | muslim | rm2-3k  | private-sector employed | semi-detached house | 1-3 people | No  | not cooking        |
| 79 | female | 50-65 | Secondary/Certificate | married | muslim | rm2-3k  | self-employed           | others              | 4-6 people | Yes | daily              |
| 80 | female | 30-34 | Secondary/Certificate | married | muslim | rm1-2k  | self-employed           | others              | 4-6 people | Yes | three times a week |
| 81 | male   | 50-65 | Secondary/Certificate | married | buddha | rm4-5k  | self-employed           | bungalow            | >6         | Yes | daily              |

|    |        |       |                       |         |        |         |                         |                     |            |     |                    |
|----|--------|-------|-----------------------|---------|--------|---------|-------------------------|---------------------|------------|-----|--------------------|
| 82 | male   | 35-49 | Secondary/Certificate | married | buddha | rm5-10k | self-employed           | semi-detached house | 4-6 people | No  | not cooking        |
| 83 | male   | 50-65 | Secondary/Certificate | married | muslim | rm1-2k  | self-employed           | others              | 4-6 people | No  | not cooking        |
| 84 | female | 25-29 | Diploma/Degree        | married | muslim | rm1-2k  | private-sector employed | others              | 4-6 people | Yes | daily              |
| 85 | female | 50-65 | Primary               | married | muslim | <rm1k   | housewife               | others              | 4-6 people | Yes | three times a week |
| 86 | female | 25-29 | Diploma/Degree        | married | muslim | <rm1k   | housewife               | detached house      | 4-6 people | Yes | daily              |
| 87 | male   | 25-29 | Diploma/Degree        | single  | muslim | rm2-3k  | self-employed           | others              | >6         | Yes | daily              |
| 88 | female | 18-24 | Diploma/Degree        | single  | muslim | rm1-2k  | student                 | others              | 4-6 people | Yes | daily              |
| 89 | male   | 35-49 | Secondary/Certificate | married | muslim | rm2-3k  | self-employed           | others              | 4-6 people | Yes | daily              |
| 90 | female | 35-49 | Diploma/Degree        | married | muslim | rm2-3k  | civil servant           | others              | 4-6 people | Yes | daily              |
| 91 | female | 18-24 | Secondary/Certificate | married | muslim | <rm1k   | housewife               | terrace             | 4-6 people | yes | daily              |
| 92 | male   | 50-65 | Primary               | married | muslim | rm2-3k  | self-employed           | terrace             | 1-3 people | yes | daily              |
| 93 | male   | 50-65 | Secondary/Certificate | married | muslim | <rm1k   | retiree                 | village             | 4-6 people | yes | daily              |
| 94 | male   | 35-49 | Secondary/Certificate | married | muslim | rm1-2k  | self-employed           | village             | 4-6 people | yes | daily              |
| 95 | female | 50-65 | Secondary/Certificate | married | muslim | <rm1k   | housewife               | semi-detached house | 1-3 people | yes | daily              |
| 96 | female | 50-58 | Secondary/Certificate | married | muslim | rm1-2k  | housewife               | village             | 4-6 people | yes | daily              |

|     |        |       |                       |         |        |        |                         |                     |            |     |                    |
|-----|--------|-------|-----------------------|---------|--------|--------|-------------------------|---------------------|------------|-----|--------------------|
| 97  | male   | 18-24 | Diploma/Degree        | single  | muslim | rm2-3k | self-employed           | village             | 4-6 people | yes | daily              |
| 98  | female | 25-29 | Secondary/Certificate | married | muslim | rm1-2k | self-employed           | village             | 4-6 people | yes | 2 times a week     |
| 99  | female | 30-34 | Diploma/Degree        | married | muslim | rm2-3k | private-sector employed | semi-detached house | 1-3 people | yes | daily              |
| 100 | female | 25-29 | Secondary/Certificate | married | muslim | <rm1k  | housewife               | terrace             | 4-6 people | yes | daily              |
| 101 | female | 25-29 | Secondary/Certificate | married | muslim | rm2-3k | self-employed           | village             | 4-6 people | yes | daily              |
| 102 | female | 35-49 | Secondary/Certificate | married | muslim | rm2-3k | housewife               | terrace             | 4-6 people | yes | daily              |
| 103 | female | 30-34 | Secondary/Certificate | married | muslim | <rm1k  | others                  | village             | 4-6 people | yes | daily              |
| 104 | female | 30-34 | Diploma/Degree        | married | muslim | rm4-5k | civil servant           | terrace             | 4-6 people | yes | daily              |
| 105 | male   | 18-24 | Diploma/Degree        | single  | muslim | rm1-2k | student                 | village             | 4-6 people | yes | daily              |
| 106 | male   | 50-65 | Secondary/Certificate | married | muslim | <rm1k  | others                  | village             | 1-3 people | yes | daily              |
| 107 | male   | 25-29 | Secondary/Certificate | single  | muslim | rm1-2k | self-employed           | village             | >6         | yes | daily              |
| 108 | female | 50-65 | primary               | married | muslim | rm1-2k | housewife               | village             | 1-3 people | yes | three times a week |
| 109 | female | 18-24 | Secondary/Certificate | single  | muslim | <rm1k  | self-employed           | village             | 1-3 people | yes | three times a week |
| 110 | female | 18-24 | Secondary/Certificate | married | muslim | <rm1k  | housewife               | detached house      | 4-6 people | yes | daily              |
| 111 | female | 18-24 | Diploma/Degree        | single  | muslim | <rm1k  | others                  | village             | 1-3 people | yes | daily              |



|     |        |       |                       |         |        |         |                         |          |            |     |                    |
|-----|--------|-------|-----------------------|---------|--------|---------|-------------------------|----------|------------|-----|--------------------|
| 112 | male   | 35-49 | Diploma/Degree        | single  | muslim | rm5-10k | self-employed           | bungalow | 4-6 people | yes | three times a week |
| 113 | male   | 50-65 | Diploma/Degree        | married | muslim | <rm1k   | self-employed           | village  | >6         | yes | daily              |
| 114 | female | >65   | primary               | married | muslim | <rm1k   | housewife               | village  | 1-3 people | yes | daily              |
| 115 | male   | 18-24 | Secondary/Certificate | single  | muslim | rm1-2k  | self-employed           | village  | >6         | yes | three times a week |
| 116 | male   | 35-49 | postgraduate          | married | muslim | rm5-10k | private-sector employed | bungalow | 4-6 people | yes | daily              |
| 117 | male   | 50-65 | Diploma/Degree        | married | muslim | rm1-2k  | private-sector employed | bungalow | 4-6 people | yes | three times a week |
| 118 | male   | 18-24 | Secondary/Certificate | single  | muslim | rm1-2k  | student                 | bungalow | >6         | yes | daily              |
| 119 | male   | 30-34 | Secondary/Certificate | single  | muslim | <rm1k   | self-employed           | village  | 1-3 people | no  | not cooking        |
| 120 | male   | 35-49 | Diploma/Degree        | married | muslim | rm4-5k  | self-employed           | bungalow | 4-6 people | yes | daily              |
| 121 | male   | 18-24 | Secondary/Certificate | single  | muslim | <rm1k   | student                 | bungalow | 4-6 people | no  | not cooking        |
| 122 | male   | 25-29 | Secondary/Certificate | single  | muslim | <rm1k   | private-sector employed | bungalow | 4-6 people | yes | daily              |
| 123 | female | 35-49 | Secondary/Certificate | married | muslim | rm1-2k  | self-employed           | bungalow | 4-6 people | yes | daily              |
| 124 | female | 50-65 | Secondary/Certificate | single  | muslim | rm1-2k  | housewife               | bungalow | 1-3 people | yes | three times a week |
| 125 | female | 18-24 | Diploma/Degree        | married | muslim | <rm1k   | housewife               | terrace  | 1-3 people | yes | daily              |

|     |        |       |                       |         |        |         |                         |                     |            |     |                |
|-----|--------|-------|-----------------------|---------|--------|---------|-------------------------|---------------------|------------|-----|----------------|
| 126 | female | 50-65 | Secondary/Certificate | married | muslim | rm4-5k  | private-sector employed | terrace             | 4-6 people | yes | 2 times a week |
| 127 | female | 25-29 | Diploma/Degree        | married | muslim | rm5-10k | civil servant           | semi-detached house | 1-3 people | yes | daily          |
| 128 | male   | 35-49 | Secondary/Certificate | married | muslim | rm5-10k | civil servant           | bungalow            | >6         | yes | once a week    |
| 129 | female | 35-49 | Secondary/Certificate | married | muslim | rm1-2k  | housewife               | village             | 1-3 people | yes | daily          |
| 130 | female | 35-49 | Secondary/Certiifcate | married | muslim | <rm1k   | housewife               | detached house      | 4-6 people | yes | daily          |
| 131 | female | 30-34 | Secondary/Certificate | married | muslim | rm1-2k  | self-employed           | terrace             | 4-6 people | yes | daily          |
| 132 | female | 30-34 | Diploma/Degree        | married | muslim | <rm1k   | housewife               | detached house      | 4-6 people | yes | daily          |
| 133 | female | 30-34 | Secondary/Certiifcate | married | muslim | rm1-2k  | self-employed           | terrace             | 4-6 people | yes | daily          |
| 134 | male   | >65   | primary               | married | muslim | rm1-2k  | retiree                 | terrace             | 1-3 people | yes | daily          |
| 135 | male   | 30-34 | Diploma/Degree        | married | muslim | rm2-3k  | private-sector employed | village             | 4-6 people | yes | daily          |
| 136 | male   | 25-29 | Diploma/Degree        | single  | muslim | rm1-2k  | self-employed           | village             | 4-6 people | yes | daily          |
| 137 | female | 35-49 | Secondary/Certificate | married | muslim | rm1-2k  | private-sector employed | semi-detached house | >6         | yes | daily          |
| 138 | female | 30-34 | Diploma/Degree        | married | muslim | rm2-3k  | private-sector employed | terrace             | 4-6 people | yes | 2 times a week |
| 139 | female | 35-49 | primary               | married | muslim | <rm1k   | housewife               | terrace             | 4-6 people | yes | daily          |
| 140 | female | 50-65 | Secondary/Certificate | married | muslim | rm2-3k  | housewife               | terrace             | 1-3 people | yes | daily          |

|     |        |       |                       |         |        |         |                         |          |            |     |                    |
|-----|--------|-------|-----------------------|---------|--------|---------|-------------------------|----------|------------|-----|--------------------|
| 141 | female | 35-49 | Secondary/Certificate | married | muslim | rm2-3k  | housewife               | terrace  | 4-6 people | yes | daily              |
| 142 | female | 30-34 | Secondary/Certificate | married | muslim | rm1-2k  | housewife               | terrace  | 4-6 people | yes | daily              |
| 143 | female | 35-49 | Secondary/Certificate | married | muslim | rm5-10k | civil servant           | terrace  | 4-6 people | yes | daily              |
| 144 | female | 30-34 | Secondary/Certificate | married | muslim | <rm1k   | housewife               | terrace  | 4-6 people | yes | daily              |
| 145 | male   | 35-49 | primary               | married | muslim | rm2-3k  | self-employed           | terrace  | 4-6 people | yes | daily              |
| 146 | female | 25-29 | Diploma/Degree        | married | muslim | rm5-10k | private-sector employed | terrace  | 4-6 people | yes | three times a week |
| 147 | female | 25-29 | Diploma/Degree        | single  | muslim | rm2-3k  | private-sector employed | terrace  | 4-6 people | yes | three times a week |
| 148 | male   | 25-29 | Secondary/Certificate | single  | muslim | <rm1k   | self-employed           | terrace  | 1-3 people | no  | not cooking        |
| 149 | male   | 25-29 | Secondary/Certificate | married | muslim | rm1-2k  | self-employed           | terrace  | 1-3 people | yes | daily              |
| 150 | male   | 30-34 | Secondary/Certificate | married | muslim | rm2-3k  | self-employed           | terrace  | 4-6 people | yes | daily              |
| 151 | female | 35-49 | Secondary/Certificate | married | muslim | rm2-3k  | housewife               | terrace  | 4-6 people | yes | daily              |
| 152 | female | 30-34 | Secondary/Certificate | married | muslim | rm1-2k  | housewife               | terrace  | >6         | yes | daily              |
| 153 | male   | 18-24 | Secondary/Certificate | single  | muslim | rm2-3k  | self-employed           | village  | 4-6 people | yes | daily              |
| 154 | male   | 35-49 | Secondary/Certificate | married | muslim | rm4-5k  | self-employed           | terrace  | 4-6 people | yes | daily              |
| 155 | female | 30-34 | Secondary/Certificate | married | muslim | rm1-2k  | self-employed           | terrace  | 4-6 people | yes | daily              |
| 156 | male   | 35-49 | Secondary/Certificate | married | muslim | rm4-5k  | self-employed           | bungalow | 1-3 people | yes | daily              |

|     |        |       |                       |         |        |        |                         |                     |            |     |                    |
|-----|--------|-------|-----------------------|---------|--------|--------|-------------------------|---------------------|------------|-----|--------------------|
| 157 | male   | 18-24 | Diploma/Degree        | married | muslim | rm2-3k | self-employed           | semi-detached house | 4-6 people | no  | not cooking        |
| 158 | female | 35-49 | Secondary/Certificate | married | muslim | <rm1k  | housewife               | terrace             | >6         | yes | daily              |
| 159 | male   | >56   | Secondary/Certificate | married | muslim | rm2-3k | civil servant           | terrace             | 1-3 people | yes | three times a week |
| 160 | female | 25-29 | Secondary/Certificate | married | muslim | rm1-2k | housewife               | terrace             | 4-6 people | yes | daily              |
| 161 | male   | 30-34 | Secondary/Certificate | married | muslim | rm2-3k | civil servant           | terrace             | 4-6 people | yes | daily              |
| 162 | male   | >60   | Secondary/Certificate | married | muslim | rm4-5k | retiree                 | terrace             | 1-3 people | yes | 2 times a week     |
| 163 | male   | 39-49 | Secondary/Certificate | married | muslim | rm2-3k | private-sector employed | terrace             | 4-6 people | yes | three times a week |
| 164 | female | >56   | Secondary/Certificate | married | muslim | rm2-3k | housewife               | terrace             | >6         | yes | daily              |
| 165 | female | 25-29 | Secondary/Certiifcate | married | muslim | rm2-3k | housewife               | semi-detached house | 1-3 people | yes | daily              |
| 166 | female | 25-29 | Secondary/Certificate | married | muslim | rm1-2k | housewife               | detached house      | 1-3 people | yes | daily              |
| 167 | female | 18-24 | Secondary/Certificate | married | muslim | >rm1k  | housewife               | semi-detached house | 4-6 people | yes | three times a week |
| 168 | female | 25-29 | Secondary/Certificate | married | muslim | rm1-2k | private-sector employed | terrace             | 4-6 people | yes | daily              |
| 169 | male   | 35-49 | Secondary/Certificate | single  | muslim | rm2-3k | private-sector employed | detached house      | 4-6 people | yes | three times a week |
| 170 | female | >59   | Secondary/Certificate | married | muslim | >rm1k  | housewife               | detached house      | 4-6 people | yes | daily              |

|     |        |       |                       |         |        |         |                         |                     |            |     |                    |
|-----|--------|-------|-----------------------|---------|--------|---------|-------------------------|---------------------|------------|-----|--------------------|
| 171 | female | 25-29 | Secondary/Certificate | married | muslim | >rm1k   | housewife               | terrace             | 1-3 people | yes | daily              |
| 172 | male   | 25-29 | Secondary/Certificate | married | muslim | rm1-2k  | civil servant           | semi-detached house | 4-6 people | yes | daily              |
| 173 | male   | 35-49 | Secondary/Certificate | married | muslim | rm2-3k  | civil servant           | terrace             | 4-6 people | yes | daily              |
| 174 | male   | 35-49 | Diploma/Degree        | married | muslim | rm2-3k  | civil servant           | semi-detached house | 4-6 people | yes | 2 times a week     |
| 175 | female | 18-24 | Diploma/Degree        | married | muslim | rm2-3k  | private-sector employed | detached house      | 4-6 people | yes | daily              |
| 176 | female | 35-49 | Secondary/Certificate | single  | muslim | >rm1k   | self-employed           | terrace             | 4-6 people | yes | daily              |
| 177 | female | >57   | Secondary/Certificate | married | muslim | >rm1k   | retiree                 | terrace             | 1-3 people | yes | daily              |
| 178 | female | 18-24 | Diploma/Degree        | single  | muslim | >rm1k   | self-employed           | semi-detached house | 4-6 people | yes | daily              |
| 179 | male   | 35-49 | Secondary/Certificate | married | muslim | rm2-3k  | self-employed           | terrace             | 4-6 people | yes | 2 times a week     |
| 180 | male   | 35-49 | Secondary/Certificate | married | muslim | rm4-5k  | civil servant           | terrace             | >6         | yes | daily              |
| 181 | male   | 35-49 | Secondary/Certificate | married | muslim | rm1-2k  | private-sector employed | bungalow            | 4-6 people | yes | three times a week |
| 182 | female | >61   | Secondary/Certificate | married | muslim | >rm1k   | housewife               | bungalow            | 4-6 people | yes | daily              |
| 183 | male   | 30-34 | Diploma/Degree        | married | muslim | rm2-3k  | civil servant           | detached house      | 1-3 people | yes | daily              |
| 184 | male   | 35-49 | Diploma/Degree        | married | muslim | rm4-5k  | civil servant           | semi-detached house | 4-6 people | yes | 2 times a week     |
| 185 | female | 18-24 | Diploma/Degree        | single  | muslim | rm5-10k | self-employed           | terrace             | 4-6 people | yes | 2 times a week     |

|     |        |       |                       |         |        |        |                         |                     |            |     |                |
|-----|--------|-------|-----------------------|---------|--------|--------|-------------------------|---------------------|------------|-----|----------------|
| 186 | female | 30-34 | Secondary/Certificate | married | muslim | rm2-3k | self-employed           | detached house      | >6         | yes | daily          |
| 187 | male   | 25-29 | Diploma/Degree        | single  | muslim | rm1-2k | self-employed           | semi-detached house | 1-3 people | no  | not cooking    |
| 188 | male   | 25-29 | Secondary/Certificate | single  | muslim | >rm1k  | self-employed           | semi-detached house | 1-3 people | yes | 2 times a week |
| 189 | female | >52   | Secondary/Certificate | married | muslim | rm1-2k | housewife               | semi-detached house | 1-3 people | no  | not cooking    |
| 190 | male   | 30-34 | Secondary/Certificate | single  | muslim | rm1-2k | private-sector employed | village             | >6         | yes | daily          |
| 191 | male   | >62   | Secondary/Certificate | married | muslim | >rm1k  | housewife               | terrace             | 4-6 people | yes | daily          |
| 192 | female | >54   | Secondary/Certificate | married | muslim | rm2-3k | housewife               | terrace             | 4-6 people | yes | daily          |
| 193 | male   | 30-34 | Secondary/Certificate | married | muslim | rm1-2k | self-employed           | terrace             | 4-6 people | no  | not cooking    |
| 194 | female | 30-34 | Secondary/Certificate | married | muslim | rm2-3k | self-employed           | village             | 4-6 people | yes | 2 times a week |
| 195 | female | 35-49 | Secondary/Certiifcate | married | muslim | >rm1k  | self-employed           | village             | 4-6 people | yes | 2 times a week |
| 196 | male   | 35-49 | Secondary/Certificate | married | muslim | rm1-2k | private-sector employed | detached house      | 1-3 people | yes | 2 times a week |
| 197 | female | 25-29 | Secondary/Certificate | married | muslim | >rm1k  | private-sector employed | Detached house      | >6         | yes | daily          |
| 198 | female | >62   | Diploma/Degree        | married | muslim | rm2-3k | retiree                 | bungalow            | >6         | yes | daily          |
| 199 | female | >58   | primary school        | married | muslim | rm1-2k | civil servant           | village             | 1-3 people | yes | daily          |
| 200 | male   | 25-29 | Secondary/Certificate | married | muslim | rm1-2k | self-employed           | detached house      | >6         | yes | 2 times a week |
| 201 | female | 35-49 | Secondary/Certificate | married | muslim | >rm1k  | self-employed           | detached house      | 4-6 people | yes | 2 times a week |

|     |        |       |                       |          |        |        |                         |                     |            |     |                |
|-----|--------|-------|-----------------------|----------|--------|--------|-------------------------|---------------------|------------|-----|----------------|
| 202 | female | 35-49 | Secondary/Certificate | married  | muslim | rm2-3k | private-sector employed | terrace             | 4-6 people | yes | 2 times a week |
| 203 | female | 35-49 | Secondary/Certificate | married  | muslim | rm2-3k | private-sector employed | bungalow            | 4-6 people | yes | daily          |
| 204 | female | >62   | Secondary/Certificate | married  | muslim | >rm1k  | retiree                 | village             | 1-3 people | yes | 2 times a week |
| 205 | female | 35-49 | Diploma/Degree        | married  | muslim | rm2-3k | housewife               | detached house      | >6         | yes | daily          |
| 206 | female | >51   | primary               | married  | muslim | >rm1k  | private-sector employed | village             | 1-3 people | yes | daily          |
| 207 | male   | 25-29 | Secondary/Certificate | married  | muslim | rm1-2k | self-employed           | semi-detached house | 1-3 people | yes | daily          |
| 208 | female | 35-49 | Secondary/Certificate | married  | muslim | >rm1k  | self-employed           | detached house      | 4-6 people | yes | 2 times a week |
| 209 | female | 18-24 | Diploma/Degree        | single   | muslim | rm2-3k | self-employed           | terrace             | 4-6 people | yes | 2 times a week |
| 210 | female | 30-34 | Secondary/Certificate | married  | muslim | rm2-3k | self-employed           | detached house      | >6         | yes | daily          |
| 211 | female | 30-34 | Secondary/Certificate | married  | muslim | rm2-3k | self-employed           | village             | 4-6 people | yes | 2 times a week |
| 212 | male   | 35-49 | Secondary/Certificate | married  | muslim | rm2-3k | civil servant           | terrace             | 4-6 people | yes | 2 times a week |
| 213 | male   | 35-49 | Secondary/Certificate | married  | muslim | rm4-5k | self-employed           | terrace             | >6         | yes | daily          |
| 214 | female | 20-29 | Diploma/Degree        | married  | muslim | rm4-5k | housewife               | bungalow            | 4-6 people | yes | daily          |
| 215 | female | 35-49 | Secondary/Certificate | married  | muslim | rm2-3k | housewife               | terrace             | 4-6 people | yes | daily          |
| 216 | male   | 50-65 | Secondary/Certificate | divorced | muslim | rm2-3k | Private-sector employed | Bungalow            | 1-3 people | No  | not cooking    |

|     |        |       |                       |         |        |        |                         |          |            |     |                    |
|-----|--------|-------|-----------------------|---------|--------|--------|-------------------------|----------|------------|-----|--------------------|
| 217 | Female | 30-34 | Diploma/Degree        | Married | muslim | rm1-2k | private-sector employed | Other    | 1-3 people | Yes | Daily              |
| 218 | male   | 30-34 | Diploma/Degree        | Married | muslim | rm2-3k | Private-sector employed | Other    | 4-6 people | Yes | Daily              |
| 219 | male   | 30-34 | Diploma/Degree        | Married | muslim | rm2-3k | Private-sector employed | Other    | 4-6 people | Yes | Daily              |
| 220 | male   | 50-65 | Secondary/Certificate | Married | muslim | rm2-3k | retiree                 | Other    | 1-3 people | Yes | Three times a week |
| 221 | Female | 50-65 | Secondary/Certificate | Married | muslim | rm2-3k | retiree                 | Other    | 1-3 people | Yes | Three times a week |
| 222 | Female | 35-49 | Secondary/Certificate | Married | muslim | <rm1k  | Self-employed           | Other    | 4-6 people | Yes | Daily              |
| 223 | Female | 50-65 | Primary               | Single  | muslim | <rm1k  | Housewife               | Other    | 4-6 people | Yes | Daily              |
| 224 | Female | 35-49 | Diploma/Degree        | Married | muslim | rm4-5k | Civil servant           | Bungalow | 4-6 people | Yes | Daily              |
| 225 | Female | 50-65 | Secondary/Certificate | Married | muslim | <rm1k  | Self-employed           | Bungalow | 1-3 people | Yes | Daily              |
| 226 | male   | 50-65 | Secondary/Certificate | Married | muslim | <rm1k  | Self-employed           | Bungalow | 4-6 people | Yes | Daily              |
| 227 | Female | 30-34 | Diploma/Degree        | Married | muslim | rm2-3k | Housewife               | Bungalow | 1-3 people | Yes | Daily              |
| 228 | Female | 35-49 | Secondary/Certificate | Married | muslim | rm1-2k | Self-employed           | Bungalow | 4-6 people | Yes | Daily              |
| 229 | Female | >65   | other                 | Single  | muslim | <rm1k  | Self-employed           | Bungalow | 1-3 people | Yes | Daily              |
| 230 | male   | 50-65 | Diploma/Degree        | Married | muslim | rm4-5k | retiree                 | Bungalow | 4-6 people | Yes | Daily              |



|     |        |       |                       |          |        |        |                         |                     |            |     |                    |
|-----|--------|-------|-----------------------|----------|--------|--------|-------------------------|---------------------|------------|-----|--------------------|
| 231 | Female | 30-34 | Diploma/Degree        | Married  | muslim | rm2-3k | Private-sector employed | Semi-detached house | 4-6 people | Yes | Daily              |
| 232 | male   | 35-49 | Secondary/Certificate | Married  | muslim | rm2-3k | Self-employed           | Bungalow            | 4-6 people | Yes | Daily              |
| 233 | male   | 25-29 | Diploma/Degree        | Married  | muslim | rm2-3k | Civil servant           | Semi-detached house | 1-3 people | Yes | Three times a week |
| 234 | Female | 35-49 | master                | Married  | muslim | rm4-5k | Civil servant           | Bungalow            | 4-6 people | Yes | 2 times a week     |
| 235 | male   | 18-24 | Secondary/Certificate | Single   | muslim | <rm1k  | Civil servant           | Other               | 1-3 people | Yes | Daily              |
| 236 | male   | 18-24 | master                | Single   | muslim | <rm1k  | Private-sector employed | Other               | 4-6 people | Yes | Daily              |
| 237 | male   | 50-65 | Diploma/Degree        | Married  | muslim | rm4-5k | Civil servant           | Bungalow            | 4-6 people | Yes | Daily              |
| 238 | Female | 50-65 | Secondary/Certificate | Married  | muslim | <rm1k  | Housewife               | Other               | 1-3 people | Yes | Daily              |
| 239 | Female | 30-34 | Secondary/Certificate | Married  | muslim | rm1-2k | Private-sector employed | Other               | 4-6 people | Yes | Daily              |
| 240 | male   | 35-49 | Diploma/Degree        | Married  | muslim | rm2-3k | Self-employed           | Bungalow            | >6         | Yes | Daily              |
| 241 | Female | 35-49 | Secondary/Certificate | divorced | muslim | <rm1k  | Private-sector employed | Other               | >6         | Yes | Daily              |
| 242 | Female | 35-49 | Secondary/Certificate | Married  | muslim | <rm1k  | Housewife               | Other               | 4-6 people | Yes | Daily              |
| 243 | Female | 30-34 | Secondary/Certificate | Married  | muslim | rm2-3k | Housewife               | Other               | 4-6 people | Yes | Daily              |
| 244 | Female | 30-34 | Secondary/Certificate | Single   | muslim | rm1-2k | Housewife               | Other               | 4-6 people | Yes | Daily              |
| 245 | Female | 30-34 | Primary               | Married  | muslim | rm2-3k | Housewife               | Other               | 4-6 people | Yes | Daily              |

|     |        |       |                       |         |        |        |                         |                     |            |     |       |
|-----|--------|-------|-----------------------|---------|--------|--------|-------------------------|---------------------|------------|-----|-------|
| 246 | Female | 50-65 | Secondary/Certificate | Married | muslim | rm2-3k | Housewife               | Other               | 4-6 people | Yes | Daily |
| 247 | male   | 50-65 | Secondary/Certificate | Married | muslim | rm2-3k | Self-employed           | Other               | 4-6 people | Yes | Daily |
| 248 | male   | 50-65 | Secondary/Certificate | Married | muslim | rm4-5k | retiree                 | Other               | 1-3 people | Yes | Daily |
| 249 | Female | 25-29 | Diploma/Degree        | Married | muslim | rm4-5k | Housewife               | Bungalow            | >6         | Yes | Daily |
| 250 | Female | 35-49 | Diploma/Degree        | Single  | Buddha | rm4-5k | Private-sector employed | Other               | 1-3 people | Yes | Daily |
| 251 | Female | 35-49 | Secondary/Certificate | Married | muslim | rm4-5k | Civil servant           | Other               | 4-6 people | Yes | Daily |
| 252 | male   | 35-49 | other                 | Married | muslim | >rm10k | Civil servant           | Semi-detached house | 4-6 people | Yes | Daily |
| 253 | Female | 25-29 | Secondary/Certificate | Married | muslim | rm1-2k | Self-employed           | Bungalow            | >6         | Yes | Daily |
| 254 | male   | 18-24 | Diploma/Degree        | Single  | muslim | rm1-2k | Private-sector employed | Bungalow            | 1-3 people | Yes | Daily |
| 255 | Female | 18-24 | Diploma/Degree        | Single  | muslim | rm1-2k | Self-employed           | Other               | 1-3 people | Yes | Daily |
| 256 | Female | 30-34 | master                | Married | muslim | rm4-5k | Housewife               | Bungalow            | 4-6 people | Yes | Daily |
| 257 | Female | 50-65 | Secondary/Certificate | Single  | muslim | rm1-2k | Housewife               | Bungalow            | 1-3 people | Yes | Daily |
| 258 | male   | 35-49 | Primary               | Single  | muslim | rm1-2k | Private-sector employed | Bungalow            | >6         | Yes | Daily |
| 259 | Female | 25-29 | Diploma/Degree        | Single  | muslim | <rm1k  | Private-sector employed | Bungalow            | 4-6 people | Yes | Daily |

|     |        |       |                       |         |        |        |                         |                     |            |     |                    |
|-----|--------|-------|-----------------------|---------|--------|--------|-------------------------|---------------------|------------|-----|--------------------|
| 260 | Female | 35-49 | Secondary/Certificate | Married | muslim | rm1-2k | Private-sector employed | Other               | 1-3 people | Yes | Daily              |
| 261 | male   | 30-34 | Secondary/Certificate | Married | muslim | rm1-2k | Private-sector employed | Other               | 1-3 people | Yes | Daily              |
| 262 | male   | 35-49 | Secondary/Certificate | Single  | muslim | rm1-2k | Self-employed           | Other               | 1-3 people | Yes | Daily              |
| 263 | Female | 35-49 | Secondary/Certificate | Married | muslim | <rm1k  | Self-employed           | Semi-detached house | >6         | Yes | Daily              |
| 264 | male   | 30-34 | master                | Married | muslim | rm4-5k | Self-employed           | Semi-detached house | 4-6 people | Yes | Daily              |
| 265 | Female | 50-65 | Secondary/Certificate | Single  | muslim | <rm1k  | Self-employed           | Other               | >6         | Yes | Daily              |
| 266 | Female | 25-29 | Diploma/Degree        | Single  | muslim | rm4-5k | civil servant           | Other               | 1-3 people | Yes | Three times a week |
| 267 | male   | 35-49 | Secondary/Certificate | Married | muslim | rm1-2k | Civil servant           | Other               | 1-3 people | Yes | Daily              |
| 268 | Female | 25-29 | Secondary/Certificate | Married | muslim | <rm1k  | Housewife               | Semi-detached house | 1-3 people | Yes | Daily              |
| 269 | Female | 35-49 | Secondary/Certificate | Married | muslim | rm4-5k | Civil servant           | Other               | 4-6 people | Yes | Daily              |
| 270 | male   | 35-49 | Secondary/Certificate | Married | muslim | <rm1k  | Student                 | Semi-detached house | >6         | Yes | Daily              |
| 271 | male   | >65   | Secondary/Certificate | Married | muslim | rm2-3k | Self-employed           | Other               | 1-3 people | Yes | Daily              |
| 272 | Female | 30-34 | Diploma/Degree        | Married | muslim | rm2-3k | Civil servant           | Semi-detached house | 4-6 people | Yes | Three times a week |

|     |        |       |                       |          |        |        |                         |                     |            |     |             |
|-----|--------|-------|-----------------------|----------|--------|--------|-------------------------|---------------------|------------|-----|-------------|
| 273 | Female | 35-49 | Diploma/Degree        | Married  | muslim | rm4-5k | Civil servant           | Semi-detached house | 4-6 people | Yes | Daily       |
| 274 | Female | 18-24 | Diploma/Degree        | Single   | muslim | rm2-3k | Self-employed           | Bungalow            | >6         | Yes | Daily       |
| 275 | Female | 18-24 | Diploma/Degree        | Single   | muslim | rm2-3k | Self-employed           | Bungalow            | 1-3 people | Yes | Daily       |
| 276 | Female | 18-24 | Diploma/Degree        | Single   | muslim | rm4-5k | Civil servant           | Bungalow            | 4-6 people | No  | not cooking |
| 277 | Female | 18-24 | Diploma/Degree        | Single   | muslim | rm1-2k | private-sector employed | Semi-detached house | 1-3 people | No  | not cooking |
| 278 | Female | 18-24 | Diploma/Degree        | Single   | muslim | rm4-5k | Civil servant           | Bungalow            | 4-6 people | Yes | Daily       |
| 279 | Female | 25-29 | Secondary/Certificate | Married  | muslim | rm2-3k | Civil servant           | Bungalow            | 4-6 people | Yes | Daily       |
| 280 | male   | 30-34 | Diploma/Degree        | Married  | muslim | rm4-5k | Civil servant           | Bungalow            | 1-3 people | Yes | Daily       |
| 281 | male   | 25-29 | Diploma/Degree        | Married  | muslim | rm4-5k | Civil servant           | Semi-detached house | 1-3 people | No  | not cooking |
| 282 | male   | 30-34 | Diploma/Degree        | divorced | muslim | rm2-3k | Civil servant           | Semi-detached house | 1-3 people | Yes | Daily       |
| 283 | male   | 30-34 | Diploma/Degree        | Single   | muslim | rm1-2k | Civil servant           | Semi-detached house | 4-6 people | Yes | Daily       |
| 284 | Female | 30-34 | Primary               | Single   | muslim | <rm1k  | Private-sector employed | Bungalow            | >6         | Yes | Daily       |
| 285 | Female | 25-29 | Primary               | Single   | muslim | <rm1k  | other                   | Bungalow            | >6         | Yes | Daily       |
| 286 | Female | 18-24 | Secondary/Certificate | Single   | muslim | <rm1k  | Private-sector employed | Bungalow            | >6         | Yes | Daily       |

|     |        |       |                       |         |           |        |                         |                     |            |     |                    |
|-----|--------|-------|-----------------------|---------|-----------|--------|-------------------------|---------------------|------------|-----|--------------------|
| 287 | Female | 18-24 | Secondary/Certificate | Single  | muslim    | <rm1k  | Private-sector employed | Bungalow            | >6         | Yes | Daily              |
| 288 | male   | 18-24 | Secondary/Certificate | Single  | muslim    | <rm1k  | Private-sector employed | Bungalow            | >6         | Yes | 2 times a week     |
| 289 | Female | 35-49 | Secondary/Certificate | Married | muslim    | <rm1k  | Private-sector employed | Bungalow            | >6         | Yes | Daily              |
| 290 | male   | 25-29 | Diploma/Degree        | Single  | muslim    | <rm1k  | Private-sector employed | Bungalow            | >6         | Yes | Daily              |
| 291 | male   | 18-24 | Diploma/Degree        | Single  | muslim    | <rm1k  | Self-employed           | Semi-detached house | >6         | Yes | Daily              |
| 292 | male   | 35-49 | Secondary/Certificate | Married | muslim    | rm2-3k | Civil servant           | Bungalow            | >6         | Yes | Daily              |
| 293 | male   | 18-24 | Diploma/Degree        | Single  | muslim    | rm1-2k | Self-employed           | Semi-detached house | >6         | Yes | Daily              |
| 294 | male   | 35-49 | Secondary/Certificate | Married | muslim    | <rm1k  | Self-employed           | Semi-detached house | 4-6 people | Yes | Three times a week |
| 295 | male   | 18-24 | Diploma/Degree        | Single  | muslim    | <rm1k  | Self-employed           | Bungalow            | 4-6 people | Yes | Daily              |
| 296 | male   | 30-34 | Diploma/Degree        | Married | muslim    | rm2-3k | Civil servant           | Semi-detached house | 1-3 people | Yes | Daily              |
| 297 | male   | 18-24 | Diploma/Degree        | Single  | muslim    | rm1-2k | Self-employed           | Bungalow            | 1-3 people | Yes | Daily              |
| 298 | Female | 18-24 | Diploma/Degree        | Single  | christian | rm1-2k | Private-sector employed | Bungalow            | 1-3 people | No  | not cooking        |

|     |        |       |                       |         |        |         |                         |                     |            |     |                    |
|-----|--------|-------|-----------------------|---------|--------|---------|-------------------------|---------------------|------------|-----|--------------------|
| 299 | Female | 30-34 | master                | Married | Muslim | rm4-5k  | Private-sector employed | Bungalow            | 1-3 people | Yes | Daily              |
| 300 | male   | 35-49 | Secondary/Certificate | Married | Muslim | rm1-2k  | retiree                 | Bungalow            | >6         | Yes | Daily              |
| 301 | male   | 18-24 | Diploma/Degree        | Single  | Muslim | <rm1k   | Self-employed           | Bungalow            | 1-3 people | Yes | Daily              |
| 302 | Female | 18-24 | Diploma/Degree        | Single  | Muslim | <rm1k   | Private-sector employed | Semi-detached house | 1-3 people | Yes | Daily              |
| 303 | male   | 25-29 | Diploma/Degree        | Single  | Muslim | rm1-2k  | Self-employed           | Other               | 1-3 people | Yes | Daily              |
| 304 | male   | 30-34 | master                | Married | Muslim | rm4-5k  | Civil servant           | Bungalow            | 1-3 people | Yes | Daily              |
| 305 | male   | 18-24 | master                | Single  | Muslim | rm2-3k  | Self-employed           | Bungalow            | 1-3 people | Yes | Daily              |
| 306 | Female | 25    | Secondary/Certificate | Married | Muslim | RM2,000 | Civil servant           | Other               | 1-3 people | Yes | Three times a week |
| 307 | male   | 50    | Primary               | Married | Muslim | RM1,000 | Self-employed           | Other               | 4-6 people | Yes | Daily              |
| 308 | Female | 50    | Primary               | Married | Muslim | RM900   | Housewife               | Other               | 1-3 people | Yes | Daily              |
| 309 | male   | 65    | Primary               | Married | Muslim | RM900   | Retiree                 | Other               | 4-6 people | Yes | Daily              |
| 310 | Female | 25    | Diploma/Degree        | Married | Muslim | RM900   | Housewife               | Semi-detached house | 1-3 people | Yes | Daily              |
| 311 | male   | 30    | Secondary/Certificate | Married | Muslim | RM900   | Self-employed           | Other               | 4-6 people | Yes | Daily              |
| 312 | Female | 35    | Secondary/Certificate | Married | Muslim | RM1,000 | Civil servant           | Other               | >6         | Yes | Daily              |
| 313 | Female | 30    | Diploma/Degree        | Married | Muslim | RM900   | Civil servant           | Other               | 4-6 people | Yes | Daily              |
| 314 | male   | 65    | Secondary/Certificate | Married | Muslim | RM2,000 | Civil servant           | Bungalow            | 1-3 people | Yes | Daily              |

|     |        |    |                       |         |        |         |                         |          |            |     |                    |
|-----|--------|----|-----------------------|---------|--------|---------|-------------------------|----------|------------|-----|--------------------|
| 315 | male   | 65 | Secondary/Certificate | Married | Muslim | RM4,000 | Civil servant           | Other    | >6         | No  | not cooking        |
| 316 | Female | 25 | Secondary/Certificate | Single  | Muslim | RM900   | Student                 | Other    | >6         | Yes | Daily              |
| 317 | male   | 65 | Primary               | Married | Muslim | RM1,000 | Self-employed           | Other    | >6         | Yes | Daily              |
| 318 | male   | 65 | Diploma/Degree        | Married | Muslim | RM5,000 | Civil servant           | Bungalow | 4-6 people | Yes | Daily              |
| 319 | male   | 35 | Secondary/Certificate | Married | Muslim | RM2,000 | Private-sector employed | Other    | >6         | Yes | Daily              |
| 320 | male   | 35 | Secondary/Certificate | Married | Muslim | RM1,000 | Retiree                 | Other    | 4-6 people | Yes | Daily              |
| 321 | male   | 25 | Secondary/Certificate | Single  | Muslim | RM4,000 | Civil servant           | Bungalow | 4-6 people | Yes | Daily              |
| 322 | Female | 30 | Diploma/Degree        | Married | Muslim | RM2,000 | Self-employed           | Other    | 4-6 people | Yes | Daily              |
| 323 | Female | 30 | Diploma/Degree        | Married | Muslim | RM2,000 | Civil servant           | Other    | 4-6 people | Yes | once a week        |
| 324 | Female | 35 | Secondary/Certificate | Married | Muslim | RM1,000 | Civil servant           | Other    | 1-3 people | Yes | Daily              |
| 325 | male   | 35 | Secondary/Certificate | Married | Muslim | RM1,000 | Self-employed           | Other    | 1-3 people | Yes | Three times a week |
| 326 | Female | 65 | Secondary/Certificate | Married | Muslim | RM1,000 | Civil servant           | Other    | 1-3 people | Yes | Daily              |
| 327 | male   | 18 | Primary               | Single  | Muslim | RM2,000 | Self-employed           | Bungalow | 4-6 people | Yes | Three times a week |
| 328 | Female | 35 | Primary               | Married | Muslim | RM2,000 | Civil servant           | Other    | 4-6 people | Yes | Three times a week |
| 329 | male   | 65 | Secondary/Certificate | Married | Muslim | RM900   | Retiree                 | Other    | 1-3 people | No  | not cooking        |
| 330 | male   | 50 | Primary               | Married | Muslim | RM900   | Self-employed           | Other    | 4-6 people | Yes | Daily              |

|     |        |    |                       |         |        |         |                         |          |            |     |                    |
|-----|--------|----|-----------------------|---------|--------|---------|-------------------------|----------|------------|-----|--------------------|
| 331 | male   | 25 | Secondary/Certificate | Married | Muslim | RM900   | Self-employed           | Other    | >6         | Yes | Daily              |
| 332 | male   | 30 | Secondary/Certificate | Married | Muslim | RM4,000 | Self-employed           | Bungalow | 4-6 people | Yes | Three times a week |
| 333 | male   | 25 | Diploma/Degree        | Single  | Muslim | RM900   | Student                 | Other    | 7          | Yes | Daily              |
| 334 | male   | 50 | Secondary/Certificate | Married | Muslim | RM1,000 | Self-employed           | Other    | 4-6 people | Yes | Three times a week |
| 335 | Female | 50 | Primary               | Married | Muslim | RM1,000 | Self-employed           | Other    | 1-3 people | Yes | Daily              |
| 336 | Female | 25 | Diploma/Degree        | Married | Muslim | RM4,000 | Private-sector employed | Other    | 1-3 people | Yes | Three times a week |
| 337 | male   | 35 | Diploma/Degree        | Married | Muslim | RM4,000 | Civil servant           | Other    | 1-3 people | Yes | Daily              |
| 338 | Female | 65 | Secondary/Certificate | Married | Muslim | RM2,000 | Civil servant           | Other    | 4-6 people | Yes | Three times a week |

---

#### METHODS OF HOUSEHOLD WASTE DISPOSAL

---

| ID | Types of waste generated by household | Practice of waste segregation | Site of household disposal | Transportation of waste |
|----|---------------------------------------|-------------------------------|----------------------------|-------------------------|
| 1  | Food debris                           | No                            | Appropriate site           | own self                |
| 2  | Food debris                           | No                            | Appropriate site           | own self                |
| 3  | Bottles and cans                      | Yes                           | Appropriate site           | own self                |
| 4  | Food debris                           | No                            | Appropriate site           | own self                |
| 5  | Food debris                           | No                            | Appropriate site           | own self                |
| 6  | Bottles and cans                      | Yes                           | Appropriate site           | own self                |
| 7  | Bottles and cans                      | Yes                           | Appropriate site           | own self                |
| 8  | Food debris                           | Yes                           | Appropriate site           | own self                |
| 9  | Food debris                           | No                            | Appropriate site           | own self                |
| 10 | Plastics                              | Yes                           | Appropriate site           | own self                |



|    |                  |     |                  |                |
|----|------------------|-----|------------------|----------------|
| 11 | Food debris      | Yes | Appropriate site | own self       |
| 12 | Food debris      | No  | Appropriate site | own self       |
| 13 | Plastics         | No  | Appropriate site | own self       |
| 14 | Plastics         | No  | Appropriate site | own self       |
| 15 | Bottles and cans | Yes | Appropriate site | own self       |
| 16 | Bottles and cans | Yes | Appropriate site | own self       |
| 17 | Food debris      | No  | Appropriate site | own self       |
| 18 | Plastics         | No  | Appropriate site | Children       |
| 19 | Food debris      | Yes | Appropriate site | own self       |
| 20 | Food debris      | No  | Appropriate site | own self       |
| 21 | Food debris      | Yes | Appropriate site | Children       |
| 22 | Plastics         | Yes | Appropriate site | own self       |
| 23 | Plastics         | Yes | Appropriate site | own self       |
| 24 | Food debris      | No  | Appropriate site | own self       |
| 25 | Food debris      | No  | Appropriate site | own self       |
| 26 | Bottles and cans | Yes | Appropriate site | Children       |
| 27 | Food debris      | Yes | Appropriate site | own self       |
| 28 | Food debris      | Yes | Appropriate site | own self       |
| 29 | Food debris      | No  | Appropriate site | own self       |
| 30 | Food debris      | No  | Appropriate site | own self       |
| 31 | Food debris      | No  | Appropriate site | paid collector |
| 32 | Plastics         | Yes | Appropriate site | paid collector |
| 33 | Food debris      | No  | Appropriate site | own self       |
| 34 | Plastics         | Yes | Appropriate site | own self       |
| 35 | Food debris      | Yes | Appropriate site | own self       |
| 36 | Food debris      | Yes | Appropriate site | own self       |
| 37 | Food debris      | No  | Appropriate site | own self       |
| 38 | Food debris      | Yes | Appropriate site | paid collector |
| 39 | Food debris      | Yes | Appropriate site | own self       |
| 40 | Food debris      | No  | Appropriate site | own self       |
| 41 | Food debris      | Yes | Appropriate site | own self       |

|    |             |     |                  |                |
|----|-------------|-----|------------------|----------------|
| 42 | Food debris | Yes | Appropriate site | own self       |
| 43 | Food debris | No  | Appropriate site | own self       |
| 44 | Food debris | No  | Appropriate site | own self       |
| 45 | Plastics    | No  | Appropriate site | own self       |
| 46 | Plastics    | Yes | Appropriate site | own self       |
| 47 | Food debris | Yes | Appropriate site | own self       |
| 48 | Food debris | Yes | Appropriate site | own self       |
| 49 | Food debris | Yes | Appropriate site | own self       |
| 50 | Food debris | Yes | Appropriate site | Children       |
| 51 | Food debris | Yes | Appropriate site | own self       |
| 52 | Food debris | Yes | Appropriate site | own self       |
| 53 | Food debris | Yes | Appropriate site | Children       |
| 54 | Food debris | Yes | Appropriate site | own self       |
| 55 | Food debris | Yes | Appropriate site | own self       |
| 56 | Food debris | No  | Appropriate site | own self       |
| 57 | Food debris | Yes | Appropriate site | own self       |
| 58 | Food debris | Yes | Appropriate site | own self       |
| 59 | Food debris | Yes | Appropriate site | Children       |
| 60 | Plastics    | Yes | Appropriate site | own self       |
| 61 | Plastics    | No  | Appropriate site | others         |
| 62 | Food debris | No  | Appropriate site | own self       |
| 63 | Food debris | Yes | Appropriate site | own self       |
| 64 | Plastics    | No  | Appropriate site | paid collector |
| 65 | Plastics    | Yes | Appropriate site | own self       |
| 66 | Food debris | No  | Appropriate site | Children       |
| 67 | Food debris | No  | Appropriate site | own self       |
| 68 | Food debris | No  | Appropriate site | own self       |
| 69 | Food debris | No  | Appropriate site | own self       |
| 70 | Plastics    | No  | Appropriate site | own self       |
| 71 | Food debris | No  | Appropriate site | own self       |
| 72 | Plastics    | Yes | Appropriate site | own self       |

|     |                  |     |                  |                |
|-----|------------------|-----|------------------|----------------|
| 73  | Food debris      | Yes | Appropriate site | own self       |
| 74  | Food debris      | Yes | Appropriate site | own self       |
| 75  | Plastics         | Yes | Appropriate site | paid collector |
| 76  | Food debris      | No  | Appropriate site | paid collector |
| 77  | Food debris      | No  | Appropriate site | paid collector |
| 78  | Food debris      | Yes | Appropriate site | own self       |
| 79  | Food debris      | No  | Appropriate site | paid collector |
| 80  | Food debris      | No  | Appropriate site | others         |
| 81  | Plastics         | No  | Appropriate site | own self       |
| 82  | Bottles and cans | No  | Appropriate site | own self       |
| 83  | Food debris      | Yes | Appropriate site | own self       |
| 84  | Food debris      | No  | Appropriate site | own self       |
| 85  | Food debris      | Yes | Appropriate site | paid collector |
| 86  | Plastics         | No  | Appropriate site | others         |
| 87  | Food debris      | No  | Appropriate site | own self       |
| 88  | Food debris      | Yes | Appropriate site | own self       |
| 89  | Food debris      | Yes | Appropriate site | own self       |
| 90  | Food debris      | No  | Appropriate site | own self       |
| 91  | Plastics         | No  | Appropriate site | others         |
| 92  | Plastics         | No  | Appropriate site | own self       |
| 93  | Plastics         | No  | Appropriate site | others         |
| 94  | Food debris      | No  | Appropriate site | own self       |
| 95  | Food debris      | No  | Appropriate site | Children       |
| 96  | Food debris      | Yes | Appropriate site | Children       |
| 97  | Food debris      | No  | Appropriate site | own self       |
| 98  | others           | No  | Appropriate site | others         |
| 99  | Food debris      | No  | Appropriate site | own self       |
| 100 | Food debris      | No  | Appropriate site | own self       |
| 101 | Food debris      | No  | Appropriate site | own self       |
| 102 | others           | No  | Inappropriate    | Children       |
| 103 | Food debris      | No  | Inappropriate    | own self       |

|     |                  |     |                  |                |
|-----|------------------|-----|------------------|----------------|
| 104 | Food debris      | Yes | Appropriate site | own self       |
| 105 | Bottles and cans | Yes | Appropriate site | own self       |
| 106 | Food debris      | No  | Appropriate site | own self       |
| 107 | Food debris      | No  | Appropriate site | own self       |
| 108 | Plastics         | No  | Appropriate site | Children       |
| 109 | Food debris      | Yes | Appropriate site | own self       |
| 110 | Food debris      | No  | Inappropriate    | own self       |
| 111 | Food debris      | Yes | Appropriate site | own self       |
| 112 | Food debris      | No  | Appropriate site | own self       |
| 113 | Food debris      | No  | Appropriate site | Children       |
| 114 | Food debris      | No  | Appropriate site | own self       |
| 115 | Food debris      | No  | Appropriate site | own self       |
| 116 | Food debris      | No  | Appropriate site | own self       |
| 117 | Food debris      | Yes | Appropriate site | own self       |
| 118 | Food debris      | Yes | Appropriate site | own self       |
| 119 | Food debris      | No  | Appropriate site | own self       |
| 120 | Food debris      | No  | Appropriate site | own self       |
| 121 | Food debris      | No  | Appropriate site | own self       |
| 122 | Bottles and cans | Yes | Appropriate site | own self       |
| 123 | Food debris      | No  | Appropriate site | own self       |
| 124 | Plastics         | Yes | Appropriate site | own self       |
| 125 | Food debris      | Yes | Appropriate site | own self       |
| 126 | Food debris      | Yes | Appropriate site | Paid collector |
| 127 | Food debris      | Yes | Appropriate site | own self       |
| 128 | Food debris      | Yes | Appropriate site | own self       |
| 129 | Food debris      | Yes | Appropriate site | own self       |
| 130 | Food debris      | Yes | Appropriate site | own self       |
| 131 | Food debris      | Yes | Appropriate site | own self       |
| 132 | Food debris      | Yes | Appropriate site | Paid collector |
| 133 | Food debris      | Yes | Appropriate site | own self       |
| 134 | Plastics         | no  | Appropriate site | others         |

|     |                  |     |                  |                |
|-----|------------------|-----|------------------|----------------|
| 135 | Food debris      | no  | Appropriate site | own self       |
| 136 | Food debris      | Yes | Appropriate site | own self       |
| 137 | Food debris      | No  | Appropriate site | Paid collector |
| 138 | Food debris      | Yes | Appropriate site | others         |
| 139 | Food debris      | No  | Appropriate site | others         |
| 140 | Food debris      | Yes | Appropriate site | others         |
| 141 | Food debris      | No  | Appropriate site | others         |
| 142 | Food debris      | No  | Appropriate site | others         |
| 143 | Food debris      | No  | Appropriate site | others         |
| 144 | Plastics         | No  | Appropriate site | others         |
| 145 | Food debris      | No  | Appropriate site | others         |
| 146 | Food debris      | No  | Appropriate site | others         |
| 147 | Food debris      | No  | Appropriate site | others         |
| 148 | Food debris      | No  | Appropriate site | own self       |
| 149 | Food debris      | No  | Appropriate site | own self       |
| 150 | Food debris      | No  | Appropriate site | own self       |
| 151 | Food debris      | No  | Appropriate site | others         |
| 152 | Food debris      | No  | Appropriate site | others         |
| 153 | Food debris      | No  | Appropriate site | own self       |
| 154 | Food debris      | Yes | Appropriate site | Paid collector |
| 155 | Food debris      | No  | Appropriate site | Paid collector |
| 156 | Food debris      | No  | Appropriate site | own self       |
| 157 | Plastics         | Yes | Appropriate site | own self       |
| 158 | Food debris      | Yes | Appropriate site | own self       |
| 159 | Food debris      | No  | Appropriate site | others         |
| 160 | Plastics         | No  | Appropriate site | others         |
| 161 | Plastics         | No  | Appropriate site | own self       |
| 162 | Food debris      | No  | Appropriate site | own self       |
| 163 | Bottles and cans | Yes | Appropriate site | others         |
| 164 | Food debris      | No  | Appropriate site | others         |
| 165 | Bottles and cans | No  | Appropriate site | own self       |

|     |                  |     |                  |                |
|-----|------------------|-----|------------------|----------------|
| 166 | Food debris      | No  | Appropriate site | own self       |
| 167 | Plastics         | Yes | Appropriate site | own self       |
| 168 | Food debris      | No  | Appropriate site | Paid collector |
| 169 | Bottles and cans | Yes | Appropriate site | Paid collector |
| 170 | Food debris      | No  | Appropriate site | Paid collector |
| 171 | Food debris      | Yes | Appropriate site | own self       |
| 172 | Food debris      | Yes | Appropriate site | own self       |
| 173 | Food debris      | Yes | Appropriate site | Paid collector |
| 174 | Food debris      | Yes | Appropriate site | own self       |
| 175 | Food debris      | Yes | Appropriate site | own self       |
| 176 | Plastics         | No  | Appropriate site | Paid collector |
| 177 | Plastics         | Yes | Appropriate site | Paid collector |
| 178 | Food debris      | Yes | Appropriate site | own self       |
| 179 | Food debris      | No  | Appropriate site | own self       |
| 180 | Food debris      | No  | Appropriate site | own self       |
| 181 | Food debris      | No  | Appropriate site | own self       |
| 182 | Plastics         | No  | Inappropriate    | Children       |
| 183 | Food debris      | Yes | Appropriate site | own self       |
| 184 | Food debris      | No  | Appropriate site | own self       |
| 185 | Plastics         | No  | Appropriate site | own self       |
| 186 | others           | No  | Appropriate site | Paid collector |
| 187 | Bottles and cans | No  | Appropriate site | own self       |
| 188 | Food debris      | Yes | Appropriate site | own self       |
| 189 | Food debris      | Yes | Appropriate site | own self       |
| 190 | Plastics         | Yes | Inappropriate    | own self       |
| 191 | Plastics         | Yes | Appropriate site | Paid collector |
| 192 | Plastics         | Yes | Appropriate site | Paid collector |
| 193 | Plastics         | Yes | Appropriate site | own self       |
| 194 | Plastics         | Yes | Inappropriate    | own self       |
| 195 | others           | No  | Appropriate site | own self       |
| 196 | Food debris      | No  | Appropriate site | Paid collector |

|     |                  |     |                    |                |
|-----|------------------|-----|--------------------|----------------|
| 197 | Plastics         | No  | Inappropriate      | own self       |
| 198 | Food debris      | Yes | Appropriate site   | own self       |
| 199 | Plastics         | Yes | Inappropriate      | own self       |
| 200 | Food debris      | No  | Appropriate site   | own self       |
| 201 | Plastics         | No  | Appropriate site   | own self       |
| 202 | Food debris      | No  | Appropriate site   | own self       |
| 203 | Food debris      | Yes | Inappropriate      | own self       |
| 204 | Plastics         | No  | Appropriate site   | own self       |
| 205 | others           | No  | Appropriate site   | own self       |
| 206 | Bottles and cans | Yes | Appropriate        | Paid collector |
| 207 | Plastics         | Yes | Appropriate site   | Paid collector |
| 208 | Plastics         | Yes | Appropriate site   | own self       |
| 209 | Plastics         | Yes | Appropriate site   | own self       |
| 210 | Food debris      | No  | Appropriate site   | Paid collector |
| 211 | Plastics         | No  | Inappropriate      | own self       |
| 212 | Plastics         | Yes | Appropriate site   | Paid collector |
| 213 | Plastics         | Yes | Appropriate site   | Paid collector |
| 214 | Food debris      | No  | Appropriate site   | own self       |
| 215 | Food debris      | Yes | Appropriate site   | own self       |
| 216 | Food debris      | No  | Appropriate site   | own self       |
| 217 | food debris      | Yes | appropriate site   | own self       |
| 218 | food debris      | Yes | Appropriate site   | own self       |
| 219 | Food debris      | No  | Appropriate site   | Children       |
| 220 | Food debris      | Yes | Appropriate site   | own self       |
| 221 | Food debris      | No  | Appropriate site   | own self       |
| 222 | Food debris      | No  | Appropriate site   | own self       |
| 223 | Food debris      | No  | Appropriate site   | own self       |
| 224 | Food debris      | No  | Appropriate site   | own self       |
| 225 | bottle and tin   | No  | Inappropriate site | own self       |
| 226 | Plastics         | Yes | Appropriate site   | own self       |
| 227 | Food debris      | Yes | Appropriate site   | own self       |

|     |                |     |                    |                |
|-----|----------------|-----|--------------------|----------------|
| 228 | Food debris    | No  | Appropriate site   | own self       |
| 229 | Plastics       | No  | Inappropriate site | own self       |
| 230 | Food debris    | Yes | Appropriate site   | own self       |
| 231 | Food debris    | No  | Appropriate site   | own self       |
| 232 | Food debris    | No  | Appropriate site   | own self       |
| 233 | Food debris    | Yes | Appropriate site   | own self       |
| 234 | Food debris    | No  | Appropriate site   | own self       |
| 235 | Food debris    | No  | Appropriate site   | own self       |
| 236 | Food debris    | No  | Appropriate site   | own self       |
| 237 | bottle and tin | No  | Appropriate site   | own self       |
| 238 | Food debris    | Yes | Appropriate site   | others         |
| 239 | Food debris    | No  | Appropriate site   | paid collector |
| 240 | Food debris    | No  | Appropriate site   | own self       |
| 241 | Food debris    | Yes | Appropriate site   | others         |
| 242 | Food debris    | Yes | Appropriate site   | others         |
| 243 | Food debris    | Yes | Appropriate site   | others         |
| 244 | Food debris    | Yes | Appropriate site   | others         |
| 245 | Food debris    | No  | Appropriate site   | own self       |
| 246 | Food debris    | No  | Appropriate site   | own self       |
| 247 | Plastics       | No  | Inappropriate site | own self       |
| 248 | Food debris    | Yes | Appropriate site   | others         |
| 249 | Food debris    | Yes | Appropriate site   | own self       |
| 250 | bottle and tin | Yes | Appropriate site   | own self       |
| 251 | Food debris    | No  | Appropriate site   | own self       |
| 252 | Food debris    | No  | Appropriate site   | own self       |
| 253 | Plastics       | No  | Inappropriate site | others         |
| 254 | Food debris    | Yes | Appropriate site   | own self       |
| 255 | Food debris    | Yes | Appropriate site   | own self       |
| 256 | Food debris    | Yes | Appropriate site   | own self       |
| 257 | Food debris    | No  | Appropriate site   | own self       |
| 258 | Food debris    | No  | Appropriate site   | own self       |



|     |                |     |                  |                |
|-----|----------------|-----|------------------|----------------|
| 259 | Food debris    | No  | Appropriate site | own self       |
| 260 | Food debris    | No  | Appropriate site | own self       |
| 261 | Food debris    | No  | Appropriate site | own self       |
| 262 | Plastics       | No  | Appropriate site | own self       |
| 263 | Food debris    | Yes | Appropriate site | others         |
| 264 | Food debris    | No  | Appropriate site | own self       |
| 265 | Plastics       | No  | Appropriate site | own self       |
| 266 | Plastics       | No  | Appropriate site | own self       |
| 267 | Food debris    | No  | Appropriate site | own self       |
| 268 | Food debris    | No  | Appropriate site | own self       |
| 269 | Food debris    | No  | Appropriate site | paid collector |
| 270 | Food debris    | Yes | Appropriate site | own self       |
| 271 | Food debris    | No  | Appropriate site | own self       |
| 272 | Food debris    | No  | Appropriate site | own self       |
| 273 | Food debris    | Yes | Appropriate site | paid collector |
| 274 | Food debris    | Yes | Appropriate site | own self       |
| 275 | Food debris    | Yes | Appropriate site | own self       |
| 276 | bottle and tin | Yes | appropriate site | own self       |
| 277 | Food debris    | Yes | Appropriate site | others         |
| 278 | Food debris    | Yes | Appropriate site | others         |
| 279 | Food debris    | Yes | Appropriate site | own self       |
| 280 | Food debris    | Yes | Appropriate site | own self       |
| 281 | Food debris    | Yes | Appropriate site | own self       |
| 282 | Food debris    | Yes | Appropriate site | own self       |
| 283 | Food debris    | Yes | Appropriate site | own self       |
| 284 | Food debris    | Yes | Appropriate site | own self       |
| 285 | Food debris    | Yes | Appropriate site | own self       |
| 286 | Food debris    | Yes | Appropriate site | own self       |
| 287 | Food debris    | Yes | Appropriate site | own self       |
| 288 | bottle and tin | Yes | appropriate site | own self       |
| 289 | Food debris    | Yes | Appropriate site | own self       |

|     |             |     |                    |          |
|-----|-------------|-----|--------------------|----------|
| 290 | Food debris | Yes | Appropriate site   | own self |
| 291 | Food debris | Yes | Appropriate site   | own self |
| 292 | Food debris | Yes | Appropriate site   | own self |
| 293 | Food debris | Yes | Appropriate site   | own self |
| 294 | Plastics    | Yes | Appropriate site   | own self |
| 295 | Plastics    | Yes | Appropriate site   | own self |
| 296 | Food debris | Yes | Appropriate site   | own self |
| 297 | Food debris | Yes | Appropriate site   | own self |
| 298 | Food debris | Yes | Appropriate site   | own self |
| 299 | Food debris | Yes | Appropriate site   | own self |
| 300 | Food debris | Yes | Appropriate site   | own self |
| 301 | Food debris | Yes | Appropriate site   | own self |
| 302 | Plastics    | Yes | Appropriate site   | own self |
| 303 | Food debris | Yes | Appropriate site   | others   |
| 304 | Food debris | Yes | Appropriate site   | own self |
| 305 | Food debris | Yes | Appropriate site   | own self |
| 306 | Plastics    | Yes | Appropriate site   | own self |
| 307 | Food debris | Yes | Appropriate site   | own self |
| 308 | Food debris | Yes | Inappropriate site | own self |
| 309 | Food debris | Yes | Appropriate site   | own self |
| 310 | Food debris | No  | Appropriate site   | own self |
| 311 | Food debris | No  | Appropriate site   | own self |
| 312 | Food debris | No  | Appropriate site   | own self |
| 313 | Food debris | Yes | Appropriate site   | own self |
| 314 | Food debris | Yes | Appropriate site   | own self |
| 315 | Plastics    | Yes | Appropriate site   | own self |
| 316 | Food debris | No  | Appropriate site   | own self |
| 317 | Food debris | No  | Appropriate site   | Children |
| 318 | Food debris | Yes | Appropriate site   | own self |
| 319 | Food debris | No  | Appropriate site   | own self |
| 320 | Plastics    | No  | Appropriate site   | Children |

|     |             |     |                  |          |
|-----|-------------|-----|------------------|----------|
| 321 | Food debris | Yes | Appropriate site | own self |
| 322 | Food debris | No  | Appropriate site | own self |
| 323 | Food debris | Yes | Appropriate site | own self |
| 324 | Food debris | No  | Appropriate site | own self |
| 325 | Food debris | No  | Appropriate site | own self |
| 326 | Food debris | No  | Appropriate site | own self |
| 327 | Food debris | No  | Appropriate site | own self |
| 328 | Food debris | Yes | Appropriate site | own self |
| 329 | Food debris | Yes | Appropriate site | own self |
| 330 | Food debris | Yes | Appropriate site | own self |
| 331 | Food debris | Yes | Appropriate site | own self |
| 332 | Food debris | Yes | Appropriate site | own self |
| 333 | Food debris | No  | Appropriate site | own self |
| 334 | Plastics    | No  | Appropriate site | Children |
| 335 | Food debris | No  | Appropriate site | own self |
| 336 | Food debris | No  | Appropriate site | own self |
| 337 | Food debris | Yes | Appropriate site | own self |
| 338 | Food debris | No  | Appropriate site | own self |

---

**PERCEPTION OF HOUSEHOLD TOWARD WASTE MANAGEMENT**

---

| ID | Importance of waste management | Responsible party to clean the residential area | Improper waste management contribute to disease occurrence | The disease caused by mismanagement of waste disposal | The household members are educated on proper waste disposal | Element that motivate the household in waste disposal |
|----|--------------------------------|-------------------------------------------------|------------------------------------------------------------|-------------------------------------------------------|-------------------------------------------------------------|-------------------------------------------------------|
| 1  | It is important                | residence                                       | yes                                                        | Diarrhea                                              | Yes                                                         | Cleanliness                                           |
| 2  | It is important                | residence                                       | yes                                                        | Others                                                | Yes                                                         | Fear of illness                                       |
| 3  | It is important                | residence                                       | yes                                                        | Diarrhea                                              | Yes                                                         | Cleanliness                                           |
| 4  | It is important                | residence                                       | yes                                                        | Others                                                | No                                                          | Cleanliness                                           |
| 5  | It is important                | residence                                       | yes                                                        | Malaria                                               | No                                                          | Cleanliness                                           |

|    |                 |                  |     |          |     |                 |
|----|-----------------|------------------|-----|----------|-----|-----------------|
| 6  | It is important | residence        | yes | Others   | Yes | Cleanliness     |
| 7  | It is important | residence        | yes | Malaria  | Yes | Cleanliness     |
| 8  | It is important | residence        | yes | Others   | Yes | Cleanliness     |
| 9  | It is important | residence        | yes | Others   | Yes | Fear of illness |
| 10 | It is important | residence        | yes | Diarrhea | Yes | Cleanliness     |
| 11 | It is important | residence        | yes | Others   | Yes | Cleanliness     |
| 12 | It is important | residence        | yes | Others   | Yes | Odour           |
| 13 | It is important | residence        | yes | Diarrhea | Yes | Fear of illness |
| 14 | It is important | residence        | yes | Others   | Yes | Cleanliness     |
| 15 | It is important | residence        | yes | Others   | Yes | Cleanliness     |
| 16 | It is important | residence        | yes | Others   | Yes | Cleanliness     |
| 17 | It is important | residence        | yes | Others   | Yes | Cleanliness     |
| 18 | It is important | residence        | yes | Typhoid  | Yes | Cleanliness     |
| 19 | It is important | residence        | yes | Others   | Yes | Cleanliness     |
| 20 | It is important | residence        | yes | Others   | Yes | Cleanliness     |
| 21 | It is important | residence        | yes | Others   | Yes | Cleanliness     |
| 22 | It is important | residence        | yes | Typhoid  | Yes | Cleanliness     |
| 23 | It is important | residence        | yes | Typhoid  | Yes | Cleanliness     |
| 24 | It is important | residence        | yes | Diarrhea | Yes | Cleanliness     |
| 25 | It is important | residence        | yes | Malaria  | Yes | Cleanliness     |
| 26 | It is important | residence        | yes | Typhoid  | Yes | Cleanliness     |
| 27 | It is important | residence        | yes | Typhoid  | Yes | Cleanliness     |
| 28 | It is important | residence        | yes | Others   | Yes | Cleanliness     |
| 29 | It is important | residence        | yes | Others   | No  | Cleanliness     |
| 30 | It is important |                  | no  | Others   | Yes | Cleanliness     |
| 31 | It is important | community        | yes | Malaria  | No  | Cleanliness     |
| 32 | It is important | residence        | yes | Others   | Yes | Cleanliness     |
| 33 | It is important | residence        | yes | Diarrhea | Yes | Cleanliness     |
| 34 | It is important | district council | yes | Others   | Yes | Cleanliness     |
| 35 | It is important | residence        | yes | Diarrhea | Yes | Cleanliness     |
| 36 | It is important | residence        | yes | Diarrhea | Yes | Cleanliness     |

|    |                 |                  |     |          |     |                 |
|----|-----------------|------------------|-----|----------|-----|-----------------|
| 37 | It is important | residence        | yes | Malaria  | Yes | Cleanliness     |
| 38 | It is important | residence        | yes | Others   | Yes | Cleanliness     |
| 39 | It is important | residence        | yes | Others   | No  | Odour           |
| 40 | It is important | residence        | yes | Malaria  | Yes | Odour           |
| 41 | It is important | residence        | yes | Others   | Yes | Cleanliness     |
| 42 | It is important | district council | yes | Others   | Yes | Cleanliness     |
| 43 | It is important | residence        | yes | Others   | Yes | Fear of illness |
| 44 | It is important | residence        | yes | Others   | Yes | Cleanliness     |
| 45 | It is important | residence        | yes | Others   | Yes | Cleanliness     |
| 46 | It is important | residence        | yes | Others   | Yes | Cleanliness     |
| 47 | It is important | residence        | yes | Malaria  | No  | Cleanliness     |
| 48 | It is important | residence        | no  | Malaria  | No  | Odour           |
| 49 | It is important | residence        | yes | Malaria  | Yes | Cleanliness     |
| 50 | It is important | residence        | yes | Others   | Yes | Cleanliness     |
| 51 | It is important | residence        | yes | Others   | Yes | Odour           |
| 52 | It is important | residence        | yes | Diarrhea | Yes | Fear of illness |
| 53 | It is important | residence        | yes | Diarrhea | Yes | Odour           |
| 54 | It is important | residence        | yes | Malaria  | No  | Cleanliness     |
| 55 | It is important | residence        | yes | Malaria  | Yes | Cleanliness     |
| 56 | It is important | residence        | yes | Malaria  | No  | Cleanliness     |
| 57 | It is important | residence        | yes | Malaria  | Yes | Fear of illness |
| 58 | It is important | residence        | yes | Diarrhea | Yes | Cleanliness     |
| 59 | It is important | residence        | yes | Diarrhea | Yes | Cleanliness     |
| 60 | It is important | residence        | yes | Others   | Yes | Cleanliness     |
| 61 | It is important | residence        | yes | Diarrhea | Yes | Odour           |
| 62 | It is important | community        | yes | Malaria  | Yes | Cleanliness     |
| 63 | It is important | district council | yes | Others   | Yes | Cleanliness     |
| 64 | It is important | district council | yes | Malaria  | No  | Fear of illness |
| 65 | It is important | district council | yes | Malaria  | Yes | Cleanliness     |
| 66 | It is important | residence        | yes | Others   | No  | Cleanliness     |
| 67 | It is important | residence        | yes | Others   | Yes | Cleanliness     |

|    |                 |                  |     |          |     |                 |
|----|-----------------|------------------|-----|----------|-----|-----------------|
| 68 | It is important | district council | yes | Malaria  | Yes | Cleanliness     |
| 69 | It is important | residence        | yes | Others   | Yes | Fear of illness |
| 70 | It is important | residence        | yes | Others   | Yes | Cleanliness     |
| 71 | It is important | district council | yes | Diarrhea | Yes | Cleanliness     |
| 72 | It is important | residence        | yes | Others   | Yes | Cleanliness     |
| 73 | It is important | residence        | yes | Malaria  | Yes | Fear of illness |
| 74 | It is important | district council | yes | Typhoid  | Yes | Cleanliness     |
| 75 | It is important | residence        | yes | Others   | Yes | Cleanliness     |
| 76 | It is important | residence        | yes | Others   | Yes | Cleanliness     |
| 77 | It is important | residence        | yes | Malaria  | Yes | Cleanliness     |
| 78 | It is important | residence        | yes | Malaria  | Yes | Cleanliness     |
| 79 | It is important | residence        | yes | Others   | Yes | Cleanliness     |
| 80 | It is important | district council | no  | Others   | Yes | Cleanliness     |
| 81 | It is important | residence        | yes | Others   | Yes | Cleanliness     |
| 82 | It is important | district council | yes | Diarrhea | Yes | Cleanliness     |
| 83 | It is important | residence        | yes | Diarrhea | Yes | Cleanliness     |
| 84 | It is important | community        | yes | Diarrhea | Yes | Cleanliness     |
| 85 | It is important | residence        | yes | Others   | Yes | Cleanliness     |
| 86 | It is important | district council | yes | Diarrhea | Yes | Cleanliness     |
| 87 | It is important | district council | yes | Diarrhea | Yes | Fear of illness |
| 88 | It is important | residence        | yes | Diarrhea | Yes | Cleanliness     |
| 89 | It is important | community        | yes | Malaria  | Yes | Cleanliness     |
| 90 | It is important | residence        | yes | Diarrhea | Yes | Cleanliness     |
| 91 | It is important | residence        | yes | Diarrhea | Yes | Cleanliness     |
| 92 | It is important | residence        | yes | Others   | Yes | Odour           |
| 93 | It is important | residence        | yes | Malaria  | Yes | Cleanliness     |
| 94 | It is important | residence        | no  | Diarrhea | Yes | Odour           |
| 95 | It is important | residence        | yes | Others   | No  | Cleanliness     |
| 96 | It is important | residence        | yes | Others   | Yes | Cleanliness     |
| 97 | It is important | residence        | yes | Others   | Yes | Cleanliness     |
| 98 | It is important | residence        | yes | Others   | No  | Odour           |

|     |                     |                        |          |           |     |                  |
|-----|---------------------|------------------------|----------|-----------|-----|------------------|
| 99  | It is important     | residence              | yes      | Others    | Yes | Cleanliness      |
| 100 | It is important     | residence              | yes      | Others    | No  | Cleanliness      |
| 101 | It is important     | residence              | yes      | Others    | Yes | Cleanliness      |
| 102 | It is important     | residence              | yes      | Others    | Yes | Cleanliness      |
| 103 | It is important     | residence              | yes      | Others    | Yes | Odour            |
| 104 | It is important     | residence              | yes      | Others    | Yes | Cleanliness      |
| 105 | It is important     | residence              | yes      | Others    | Yes | Cleanliness      |
| 106 | It is important     | residence              | yes      | Others    | Yes | Cleanliness      |
| 107 | It is important     | residence              | yes      | Others    | Yes | Cleanliness      |
| 108 | It is important     | residence              | yes      | Typhoid   | Yes | Cleanliness      |
| 109 | It is important     | residence              | yes      | Others    | Yes | Cleanliness      |
| 110 | It is important     | residence              | yes      | Others    | Yes | Cleanliness      |
| 111 | It is important     | private waste operator | not sure | Others    | Yes | Cleanliness      |
| 112 | it is not important | district council       | yes      | Diarrhea  | No  | Cleanliness      |
| 113 | It is important     | residence              | yes      | Diarrhea  | Yes | Cleanliness      |
| 114 | It is important     | district council       | yes      | Diarrhea  | Yes | Cleanliness      |
| 115 | It is important     | residence              | yes      | Malaria   | Yes | Cleanliness      |
| 116 | It is important     | residence              | yes      | Others    | Yes | Fear of sickness |
| 117 | It is important     | residence              | yes      | Typhoid   | Yes | Cleanliness      |
| 118 | It is important     | residence              | yes      | Others    | Yes | Cleanliness      |
| 119 | It is important     | residence              | yes      | Others    | No  | Cleanliness      |
| 120 | It is important     | district council       | yes      | Others    | Yes | Cleanliness      |
| 121 | It is important     | residence              | yes      | diarrhea  | Yes | Cleanliness      |
| 122 | It is important     | district council       | yes      | diarrhea  | Yes | Odour            |
| 123 | It is important     | residence              | yes      | diarrhea  | Yes | Cleanliness      |
| 124 | It is important     | residence              | yes      | Others    | Yes | Fear of sickness |
| 125 | It is important     | residence              | yes      | Others    | Yes | Cleanliness      |
| 126 | It is important     | district council       | yes      | Driarrhea | Yes | Cleanliness      |
| 127 | It is important     | district council       | yes      | Malaria   | Yes | Cleanliness      |

|     |                 |                        |     |          |     |                  |
|-----|-----------------|------------------------|-----|----------|-----|------------------|
| 128 | It is important | private waste operator | yes | Diarrhea | Yes | Cleanliness      |
| 129 | It is important | private waste operator | yes | Others   | Yes | Fear of sickness |
| 130 | It is important | district council       | yes | Malaria  | Yes | Cleanliness      |
| 131 | It is important | district council       | yes | diarrhea | No  | Cleanliness      |
| 132 | It is important | district council       | yes | diarrhea | Yes | Cleanliness      |
| 133 | It is important | private waste operator | yes | Typhoid  | Yes | Cleanliness      |
| 134 | It is important | residence              | yes | Others   | Yes | Cleanliness      |
| 135 | It is important | district council       | yes | Malaria  | Yes | Cleanliness      |
| 136 | It is important | private waste operator | yes | Others   | Yes | Cleanliness      |
| 137 | It is important | district council       | yes | Typhoid  | Yes | Cleanliness      |
| 138 | It is important | residence              | yes | Others   | Yes | Cleanliness      |
| 139 | It is important | district council       | yes | Diarrhea | Yes | Fear of sickness |
| 140 | It is important | district council       | yes | Others   | Yes | Odour            |
| 141 | It is important | residence              | yes | Others   | Yes | Cleanliness      |
| 142 | It is important | residence              | yes | Others   | Yes | Cleanliness      |
| 143 | It is important | district council       | yes | Others   | Yes | Cleanliness      |
| 144 | It is important | residence              | yes | Others   | Yes | Cleanliness      |
| 145 | It is important | residence              | yes | Others   | Yes | Cleanliness      |
| 146 | It is important | residence              | yes | Others   | Yes | Cleanliness      |
| 147 | It is important | residence              | yes | Others   | Yes | Cleanliness      |
| 148 | It is important | residence              | yes | Diarrhea | Yes | Fear of sickness |
| 149 | It is important | residence              | yes | Others   | Yes | Cleanliness      |
| 150 | It is important | district council       | yes | Diarrhea | Yes | Fear of sickness |
| 151 | It is important | residence              | yes | Diarrhea | Yes | Cleanliness      |
| 152 | It is important | residence              | yes | Others   | Yes | Cleanliness      |
| 153 | It is important | district council       | yes | Others   | Yes | Cleanliness      |
| 154 | It is important | district council       | yes | Diarrhea | Yes | Cleanliness      |
| 155 | It is important | district council       | yes | Malaria  | Yes | Cleanliness      |



|     |                 |                  |          |          |     |                  |
|-----|-----------------|------------------|----------|----------|-----|------------------|
| 156 | It is important | residence        | not sure | Others   | Yes | Cleanliness      |
| 157 | It is important | district council | yes      | Malaria  | Yes | Fear of sickness |
| 158 | It is important | district council | no       | Diarrhea | Yes | Odour            |
| 159 | It is important | residence        | yes      | Others   | Yes | Cleanliness      |
| 160 | It is important | residence        | yes      | Diarrhea | Yes | Cleanliness      |
| 161 | It is important | residence        | yes      | Others   | Yes | Cleanliness      |
| 162 | It is important | residence        | yes      | Others   | Yes | Cleanliness      |
| 163 | It is important | district council | yes      | Others   | Yes | Cleanliness      |
| 164 | It is important | residence        | yes      | Malaria  | Yes | Cleanliness      |
| 165 | It is important | district council | yes      | Diarrhea | Yes | Cleanliness      |
| 166 | It is important | district council | yes      | Others   | Yes | Cleanliness      |
| 167 | It is important | district council | yes      | Malaria  | Yes | Cleanliness      |
| 168 | It is important | residence        | yes      | Others   | Yes | Cleanliness      |
| 169 | It is important | district council | yes      | Others   | Yes | Cleanliness      |
| 170 | It is important | residence        | yes      | Diarrhea | Yes | Cleanliness      |
| 171 | It is important | district council | yes      | Diarrhea | Yes | Odour            |
| 172 | It is important | district council | yes      | malaria  | Yes | Cleanliness      |
| 173 | It is important | residence        | not sure | Others   | Yes | Odour            |
| 174 | It is important | district council | yes      | Malaria  | Yes | Cleanliness      |
| 175 | It is important | district council | yes      | Typhoid  | Yes | Cleanliness      |
| 176 | It is important | district council | yes      | Others   | Yes | Cleanliness      |
| 177 | It is important | residence        | yes      | Others   | Yes | Cleanliness      |
| 178 | It is important | district council | yes      | Others   | Yes | Cleanliness      |
| 179 | It is important | residence        | yes      | Others   | Yes | Cleanliness      |
| 180 | It is important | residence        | yes      | Others   | Yes | Cleanliness      |
| 181 | It is important | residence        | yes      | Typhoid  | Yes | Cleanliness      |
| 182 | It is important | residence        | not sure | Diarrhea | Yes | Fear of sickness |
| 183 | It is important | residence        | yes      | Others   | Yes | Cleanliness      |
| 184 | It is important | district council | yes      | Diarrhea | Yes | Fear of sickness |
| 185 | It is important | residence        | yes      | Malaria  | Yes | Odour            |
| 186 | It is important | district council | yes      | Diarrhea | Yes | Cleanliness      |

|     |                 |                  |     |          |     |                  |
|-----|-----------------|------------------|-----|----------|-----|------------------|
| 187 | It is important | residence        | yes | Malaria  | Yes | Fear of sickness |
| 188 | It is important | district council | yes | Others   | Yes | Fear of sickness |
| 189 | It is important | residence        | yes | Others   | Yes | Cleanliness      |
| 190 | It is important | residence        | yes | Others   | Yes | Cleanliness      |
| 191 | It is important | residence        | yes | Others   | Yes | Cleanliness      |
| 192 | It is important | district council | yes | Others   | Yes | Cleanliness      |
| 193 | It is important | residence        | yes | Malaria  | Yes | cleanliness      |
| 194 | It is important | residence        | yes | Others   | Yes | Cleanliness      |
| 195 | It is important | residence        | yes | Diarrhea | Yes | Cleanliness      |
| 196 | It is important | district council | yes | Others   | Yes | Cleanliness      |
| 197 | It is important | residence        | yes | Others   | Yes | Odour            |
| 198 | It is important | residence        | yes | Malaria  | Yes | Cleanliness      |
| 199 | It is important | residence        | yes | Others   | Yes | Cleanliness      |
| 200 | It is important | residence        | yes | Others   | Yes | Cleanliness      |
| 201 | It is important | residence        | yes | Others   | Yes | Cleanliness      |
| 202 | It is important | residence        | yes | Malaria  | Yes | Cleanliness      |
| 203 | It is important | residence        | yes | Malaria  | Yes | Fear of sickness |
| 204 | It is important | residence        | yes | Others   | Yes | Cleanliness      |
| 205 | It is important | residence        | yes | Malaria  | Yes | Fear of sickness |
| 206 | It is important | residence        | yes | Others   | Yes | Cleanliness      |
| 207 | It is important | district council | yes | Others   | Yes | Cleanliness      |
| 208 | It is important | residence        | yes | Typhoid  | Yes | cleanliness      |
| 209 | It is important | residence        | yes | Others   | Yes | Cleanliness      |
| 210 | It is important | residence        | yes | Malaria  | Yes | Cleanliness      |
| 211 | It is important | residence        | yes | Others   | Yes | Cleanliness      |
| 212 | It is important | district council | yes | Others   | Yes | Fear of sickness |
| 213 | It is important | residence        | yes | Malaria  | Yes | Cleanliness      |
| 214 | It is important |                  | yes | Diarrhea | Yes | Cleanliness      |
| 215 | It is important | residence        | yes | Diarrhea | Yes | Cleanliness      |
| 216 | It is important | residence        | yes | Others   | Yes | Cleanliness      |
| 217 | it is important | residence        | yes | typhoid  | Yes | Cleanliness      |

|     |                 |                  |     |          |     |                 |
|-----|-----------------|------------------|-----|----------|-----|-----------------|
| 218 | it is important | community        | yes | Diarrhea | Yes | Cleanliness     |
| 219 | It is important | community        | yes | Diarrhea | Yes | Cleanliness     |
| 220 | It is important | community        | yes | Diarrhea | Yes | Fear of illness |
| 221 | It is important | community        | yes | Diarrhea | Yes | Fear of illness |
| 222 | It is important | district council | yes | Diarrhea | Yes | Fear of illness |
| 223 | It is important | district council | yes | Diarrhea | Yes | Fear of illness |
| 224 | It is important | district council | yes | Diarrhea | Yes | Cleanliness     |
| 225 | It is important | residence        | yes | Others   | Yes | Cleanliness     |
| 226 | It is important | community        | yes | Diarrhea | Yes | Cleanliness     |
| 227 | It is important | residence        | yes | Others   | Yes | Cleanliness     |
| 228 | It is important | residence        | yes | Diarrhea | Yes | Fear of illness |
| 229 | It is important | community        | yes | Others   | Yes | Cleanliness     |
| 230 | It is important | community        | yes | Diarrhea | Yes | Cleanliness     |
| 231 | It is important | community        | yes | malaria  | Yes | Fear of illness |
| 232 | It is important | district council | yes | Diarrhea | Yes | Cleanliness     |
| 233 | It is important | community        | yes | Others   | Yes | Cleanliness     |
| 234 | It is important | community        | yes | Diarrhea | Yes | Fear of illness |
| 235 | It is important | community        | yes | Others   | Yes | Cleanliness     |
| 236 | It is important | community        | yes | Diarrhea | Yes | Fear of illness |
| 237 | It is important | community        | yes | malaria  | Yes | Fear of illness |
| 238 | It is important | district council | yes | typhoid  | Yes | Cleanliness     |
| 239 | It is important | residence        | yes | malaria  | Yes | Cleanliness     |
| 240 | It is important | district council | yes | Diarrhea | Yes | Cleanliness     |
| 241 | It is important | district council | yes | Diarrhea | Yes | Cleanliness     |
| 242 | It is important | residence        | yes | Diarrhea | Yes | Cleanliness     |
| 243 | It is important | community        | yes | Diarrhea | Yes | Cleanliness     |
| 244 | It is important | residence        | yes | malaria  | Yes | Cleanliness     |
| 245 | It is important | community        | yes | Diarrhea | Yes | Cleanliness     |
| 246 | It is important | district council | yes | Others   | Yes | Cleanliness     |
| 247 | It is important | district council | yes | Diarrhea | Yes | Cleanliness     |
| 248 | It is important | community        | yes | Diarrhea | Yes | Cleanliness     |

|     |                 |                  |     |          |     |                 |
|-----|-----------------|------------------|-----|----------|-----|-----------------|
| 249 | It is important | community        | yes | Diarrhea | Yes | Cleanliness     |
| 250 | It is important | community        | yes | Diarrhea | Yes | Cleanliness     |
| 251 | It is important | community        | yes | Diarrhea | Yes | Fear of illness |
| 252 | It is important | residence        | yes |          | Yes | Fear of illness |
| 253 | It is important | community        | yes | Others   | Yes | Cleanliness     |
| 254 | It is important | district council | yes | malaria  | Yes | Cleanliness     |
| 255 | It is important | district council | yes | malaria  | Yes | Cleanliness     |
| 256 | It is important | residence        | yes | Diarrhea | Yes | Cleanliness     |
| 257 | It is important | district council | yes | Others   | Yes | Cleanliness     |
| 258 | It is important | community        | yes | malaria  | Yes | Cleanliness     |
| 259 | It is important | residence        | yes | Diarrhea | Yes | odor            |
| 260 | It is important | community        | yes | Others   | Yes | Cleanliness     |
| 261 | It is important | residence        | yes | malaria  | Yes | Cleanliness     |
| 262 | It is important | community        | yes | malaria  | Yes | Cleanliness     |
| 263 | It is important | district council | yes | Diarrhea | Yes | Cleanliness     |
| 264 | It is important | community        | yes | malaria  | Yes | Cleanliness     |
| 265 | It is important | community        | yes | malaria  | Yes | Cleanliness     |
| 266 | It is important | residence        | yes | Diarrhea | Yes | Cleanliness     |
| 267 | It is important | district council | yes | Diarrhea | Yes | Cleanliness     |
| 268 | It is important | residence        | yes | Others   | Yes | Cleanliness     |
| 269 | It is important | district council | yes | typhoid  | Yes | Cleanliness     |
| 270 | It is important | community        | yes | Others   | Yes | Cleanliness     |
| 271 | It is important | residence        | yes | Diarrhea | Yes | Cleanliness     |
| 272 | It is important | residence        | yes | Diarrhea | Yes | Cleanliness     |
| 273 | It is important | residence        | yes | Diarrhea | Yes | Cleanliness     |
| 274 | It is important | residence        | yes | malaria  | Yes | Cleanliness     |
| 275 | It is important | community        | yes | Diarrhea | Yes | Cleanliness     |
| 276 | It is important | district council | yes | Diarrhea | Yes | Cleanliness     |
| 277 | It is important | district council | yes | Diarrhea | Yes | Cleanliness     |
| 278 | It is important | district council | yes | malaria  | Yes | Cleanliness     |
| 279 | It is important | community        | yes | Diarrhea | Yes | Cleanliness     |

|     |                 |                  |     |          |     |                 |
|-----|-----------------|------------------|-----|----------|-----|-----------------|
| 280 | It is important | community        | yes | Diarrhea | Yes | Fear of illness |
| 281 | It is important | district council | yes | malaria  | Yes | Cleanliness     |
| 282 | It is important | community        | yes | Diarrhea | Yes | Cleanliness     |
| 283 | It is important | community        | yes | Diarrhea | Yes | Cleanliness     |
| 284 | It is important | residence        | yes | malaria  | Yes | Cleanliness     |
| 285 | It is important | residence        | yes | malaria  | Yes | Cleanliness     |
| 286 | It is important | residence        | yes | malaria  | Yes | Cleanliness     |
| 287 | It is important | residence        | yes | malaria  | Yes | Cleanliness     |
| 288 | It is important | residence        | yes | malaria  | Yes | Cleanliness     |
| 289 | It is important | district council | yes | Others   | Yes | Cleanliness     |
| 290 | It is important | community        | yes | typhoid  | Yes | Cleanliness     |
| 291 | It is important | community        | yes | malaria  | Yes | Cleanliness     |
| 292 | It is important | district council | yes | Diarrhea | Yes | Cleanliness     |
| 293 | It is important | district council | yes | Diarrhea | Yes | Cleanliness     |
| 294 | It is important | district council | yes | Diarrhea | Yes | odor            |
| 295 | It is important | district council | yes | Diarrhea | Yes | Fear of illness |
| 296 | It is important | district council | yes | Diarrhea | Yes | Fear of illness |
| 297 | It is important | community        | yes | malaria  | Yes | Cleanliness     |
| 298 | It is important | district council | yes | Diarrhea | Yes | Fear of illness |
| 299 | It is important | district council | yes | malaria  | Yes | Cleanliness     |
| 300 | It is important | residence        | yes | Others   | Yes | Cleanliness     |
| 301 | It is important | residence        | yes | Diarrhea | Yes | Cleanliness     |
| 302 | It is important | district council | yes | malaria  | Yes | Cleanliness     |
| 303 | It is important | district council | yes | Diarrhea | Yes | odor            |
| 304 | It is important | district council | yes | Diarrhea | Yes | Cleanliness     |
| 305 | It is important | district council | yes | Diarrhea | Yes | Cleanliness     |
| 306 | It is important | residence        | yes | Malaria  | Yes | Cleanliness     |
| 307 | It is important | residence        | yes | Others   | Yes | Cleanliness     |
| 308 | It is important | residence        | yes | Diarrhea | Yes | Cleanliness     |
| 309 | It is important | residence        | yes | Malaria  | Yes | Cleanliness     |
| 310 | It is important | residence        | yes | Malaria  | Yes | Cleanliness     |

|     |                 |                  |          |          |     |                 |
|-----|-----------------|------------------|----------|----------|-----|-----------------|
| 311 | It is important | residence        | yes      | Diarrhea | Yes | Cleanliness     |
| 312 | It is important | residence        | yes      | Malaria  | No  | Cleanliness     |
| 313 | It is important | residence        | yes      | Diarrhea | Yes | Cleanliness     |
| 314 | It is important | residence        | yes      | Malaria  | Yes | Fear of illness |
| 315 | It is important | residence        | yes      | Others   | Yes | Cleanliness     |
| 316 | It is important | residence        | yes      | Diarrhea | No  | Cleanliness     |
| 317 | It is important | district council | yes      | Malaria  | No  | Cleanliness     |
| 318 | It is important | residence        | yes      | Malaria  | Yes | Fear of illness |
| 319 | It is important | residence        | yes      | Diarrhea | No  | Cleanliness     |
| 320 | It is important | residence        | no       | Others   | No  | Cleanliness     |
| 321 | It is important | residence        | yes      | Others   | Yes | Cleanliness     |
| 322 | It is important | residence        | yes      | Malaria  | Yes | Cleanliness     |
| 323 | It is important | residence        | yes      | Typhoid  | Yes | Cleanliness     |
| 324 | It is important | residence        | yes      | Malaria  | Yes | Fear of illness |
| 325 | It is important | residence        | no       | Others   | No  | Cleanliness     |
| 326 | It is important | residence        | yes      | Typhoid  | Yes | Cleanliness     |
| 327 | It is important | residence        | yes      | Others   | Yes | Cleanliness     |
| 328 | It is important | residence        | yes      | Others   | Yes | Cleanliness     |
| 329 | It is important | residence        | yes      | Others   | Yes | Cleanliness     |
| 330 | It is important | residence        | yes      | Others   | Yes | Cleanliness     |
| 331 | It is important | residence        | yes      | Typhoid  | Yes | Cleanliness     |
| 332 | It is important | residence        | yes      | Typhoid  | Yes | Cleanliness     |
| 333 | It is important | residence        | yes      | Others   | No  | Cleanliness     |
| 334 | It is important | residence        | not sure | Others   | Yes | Cleanliness     |
| 335 | It is important | residence        | no       | Others   | Yes | Cleanliness     |
| 336 | It is important | residence        | yes      | Diarrhea | Yes | Cleanliness     |
| 337 | It is important | residence        | yes      | Diarrhea | Yes | Cleanliness     |
| 338 | It is important | residence        | yes      | Malaria  | Yes | Cleanliness     |

---
